# Supplementary material for: Genetics and Material Culture Support Repeated Expansions into Paleolithic Eurasia from a Population Hub Out of Africa
Source: PubMed Central journal article supplement — Genome Biol Evol. 2022 Apr 7;14(4):evac045. doi: 10.1093/gbe/evac045 (PMC9021735; doi:10.1093/gbe/evac045), 2022-04-07
Supplement: evac045_supplementary_data.pdf [file evac045_supplementary_data.pdf]

1

## Supplementary Materials for

### 2 **Genetics and material culture support repeated expansions into** 3 **Paleolithic Eurasia from a population Hub out of Africa**

4 Leonardo Vallini<sup>1</sup>, Giulia Marciani<sup>2,3</sup>, Serena Aneli<sup>1,4</sup>, Eugenio Bortolini<sup>2</sup>,  
5 Stefano Benazzi<sup>2,5</sup>, Telmo Pievani<sup>1</sup>, Luca Pagani<sup>1,6</sup>

6 *1 Department of Biology, University of Padova, Padova, Italy*

7 *2 Department of Cultural Heritage, University of Bologna, Ravenna, Italy*

8 *3 Department of Physical Sciences, Earth and Environment, University of Siena, Italy*

9 *4 Department of Public Health Sciences and Pediatrics, University of Turin, Turin, Italy*

10 *5 Department of Human Evolution, Max Planck Institute for Evolutionary Anthropology,*  
11 *Leipzig, Germany*

12 *6 Institute of Genomics, University of Tartu, Tartu, Estonia*

13 Supplementary Materials include:

14 - Supplementary Information

15 Section 1: Material Culture Page 2

16 Section 2: Genetic Dataset Page 10

17 Section 3: qpGraph analyses Page 12

18 Section 4: Unsupervised analysis with OrientAGraph/Treemix Page 23

19 Section 5: Paleomaps plotting Page 24

20 - Supplementary Figures S1 to S8

21 - Supplementary Tables S1 to S4

22 **Supplementary Section 1: Material Culture**

23 Many of the DNA samples discussed in this paper come from sites without stratigraphic association with diagnostic archaeological materials.

24 To overcome this issue, we use layers of sites located in proximity of and coeval to DNA sampling sites (Table S1).

25 **Table S1. Cultural proxies for the ancient genomes analysed in the current work.** M: Mousterian; S: Szeletian; IUP: Initial Upper  
 26 Paleolithic; UP: Upper Paleolithic; <sup>a</sup> indicates an attribution based on nearby coeval sites, which are specified in the subsequent rows. The  
 27 coordinates of the sites are taken from the reference articles or from the ROCEEH Out of Africa Database (ROAD) (<http://www.roceeh.org>).

| DNA Sample/Proxy                  | Sample/Site name              | Techno-complex | Country | Coordinates      | Broad chronological range (cal kyr BP) | References                                                   |
|-----------------------------------|-------------------------------|----------------|---------|------------------|----------------------------------------|--------------------------------------------------------------|
| DNA Sample                        | Vindija                       | M              | Croatia | 46.29 N, 16.07 E | ~50                                    | *                                                            |
| Pre-expansion sites in the Levant | Ksar_Akil_XXII-XXV            | IUP            | Lebanon | 33.91 N, 35.64 E | ~45-43                                 | (Leder 2014, 2017; Bosch et al. 2015)                        |
| Pre-expansion sites in the Levant | Üçagizli_F,Fa,Fb-c,G,H,H1-3,I | IUP            | Turkey  | 35.98 N, 35.96 E | ~45-40                                 | (Kuhn 2004; Kuhn et al. 2009)                                |
| Pre-expansion sites in the Levant | Umel'Tlel                     | IUP            | Syria   | 35.27 N, 38.89 E | ~40                                    | (Eric Boëda and Bonilauri 2006)                              |
| Pre-expansion sites in the Levant | Boker_Tachtit_layer_4         | IUP            | Israel  | 30.84 N, 34.78 E | ~45-40                                 | (Marks and Kaufman 1983; Kadowaki, Omori, and Nishiaki 2015) |

|                  |                      |                        |               |                          |        |                                                     |
|------------------|----------------------|------------------------|---------------|--------------------------|--------|-----------------------------------------------------|
| <b>DNASample</b> | <b>UstIshim</b>      | <b>IUP<sup>a</sup></b> | <b>Russia</b> | <b>57.7 N, 71.1 E</b>    | ~44    | *                                                   |
| Ust_Ishim        | Kara_Bom_OH_5_OH6    | IUP                    | Russia        | 50.72 N, 85.57 E         | >45    | (N. Zwyns et al. 2012)                              |
| Ust_Ishim        | Tolbor-4_layer_4-5-6 | IUP                    | Mongolia      | 49.29 N, 102.97 E        | ~45-35 | (Derevianko et al. 2013; Nicolas Zwyns et al. 2019) |
| Ust_Ishim        | Tolbor-16_layer_6    | IUP                    | Mongolia      | 49.23 N, 102.92 E        | ~45-40 | (Nicolas Zwyns et al. 2019)                         |
| Ust_Ishim        | Kamenka_A            | IUP                    | Russia        | 51.44 N, 108.17 E        | ~45-40 | (N. Zwyns and Lbova 2019)                           |
| <b>DNASample</b> | <b>Tianyuan</b>      | <b>IUP<sup>a</sup></b> | <b>China</b>  | <b>39.66 N, 115.87 E</b> | ~40    | *                                                   |
| Tianyuan         | Suindonggou_1        | IUP                    | China         | 38.38 N, 106.51 E        | <41    | (Morgan et al. 2014; E. Boëda et al. 2013)          |
| Tianyuan         | Suindonggou_2        | IUP                    | China         | 38.38 N, 106.51 E        | <41    | (Li et al. 2019; Peng et al. 2020)                  |
| <b>DNASample</b> | <b>Kostenki14</b>    | <b>UP<sup>a</sup></b>  | <b>Russia</b> | <b>51.23 N, 39.3 E</b>   | ~38    | *                                                   |
| Kostenki14       | Kostenki_12_Vokov    | UP                     | Russia        | 51.39 N, 39.05 E         | <40    | (A. A. Sinitsyn and Hoffecker 2006)                 |
| Kostenki14       | Kostenki_1           | UP                     | Russia        | 51.39 N, 39.05 E         | <40    | (Hoffecker et al. 2016)                             |

| <b>DNASample</b> | <b>Oase1</b>             | <b>IUP-UP<sup>a</sup></b> | <b>Romania</b> | <b>45.12 N, 21.9 E</b> | <b>~38</b>                | <b>*</b>                                           |
|------------------|--------------------------|---------------------------|----------------|------------------------|---------------------------|----------------------------------------------------|
| Oase1            | Bacho_Kiro_IUP_layer_11  | IUP                       | Bulgaria       | 42.95 N, 25.43 E       | >45                       | (Tsanova 2008; Hublin et al. 2020)                 |
| Oase1            | Ořechov_IV_-_Kabáty      | IUP                       | Czech Republic | ~49.06 N, 16.31 E      | ~41-35<br>(underestimate) | (Yuri E. Demidenko, Škrdla, and Rychtaříková 2020) |
| Oase1            | Brno-Bohunice            | IUP                       | Czech Republic | ~49.12 N 16.37 E       | >45                       | (Richter, Tostevin, and Škrdla 2008)               |
| Oase1            | Românești-Dumbravita     | UP                        | Romania        | 45.49 N, 22.19 E       | ~45-40                    | (Anghelinu and Niță 2014; Sitaliy et al. 2012)     |
| Oase1            | Cosava                   | UP                        | Romania        | 45.51 N, 22.19 E       | ~45-40                    | (Anghelinu and Niță 2014; Sitaliy et al. 2014)     |
| Oase1            | Tincova                  | UP                        | Romania        | 45.33 N, 22.9 E        | ~45-40                    | (Anghelinu and Niță 2014; Sitaliy et al. 2014)     |
| <b>DNASample</b> | <b>GoyetQ116-1</b>       | <b>UP<sup>a</sup></b>     | <b>Belgium</b> | <b>50.45 N, 5.01 E</b> | <b>~35</b>                | <b>*</b>                                           |
| GoyetQ116-1      | Maisières-Canal          | UP                        | Belgium        | 50.48 N, 3.98 E        | <40                       | (Pirson et al. 2012)                               |
| GoyetQ116-1      | Spy_Ossiferous_Horizon_2 | UP                        | Belgium        | 50.48 N, 4.67 E        | <40                       | (Pirson et al. 2012)                               |

|                  |                                |                          |                       |                          |        |                                                                           |
|------------------|--------------------------------|--------------------------|-----------------------|--------------------------|--------|---------------------------------------------------------------------------|
| <b>DNASample</b> | <b>Sunghir</b>                 | <b>UP</b>                | <b>Russia</b>         | <b>56.18 N, 40.50 E</b>  | ~34    | (Dobrovolskaya, Richards, and Trinkaus 2012; Trinkaus and Buzhilova 2018) |
| <b>DNASample</b> | <b>Yana</b>                    | <b>UP</b>                | <b>Russia</b>         | <b>70.72 N, 135.42 E</b> | ~31    | (Pitulko, Pavlova, and Nikolskiy 2017)                                    |
| <b>DNASample</b> | <b>Mal'ta (MA1)</b>            | <b>UP</b>                | <b>Russia</b>         | <b>52.9 N, 103.5 E</b>   | ~24    | (Khenzykhenova et al. 2019; Lbova 2019)                                   |
| <b>DNASample</b> | <b>Bacho_Kiro_IUP_layer_11</b> | <b>IUP</b>               | <b>Bulgaria</b>       | <b>42.95 N, 25.43 E</b>  | ~45    | (Hublin et al. 2020; Tsanova 2008)                                        |
| <b>DNASample</b> | <b>Zlatý_Kůň</b>               | <b>S-IUP<sup>a</sup></b> | <b>Czech Republic</b> | <b>49.37 N, 16.72 E</b>  | >45    | *                                                                         |
| Zlatý Kůň        | Szeleta                        | S                        | Hungary               | 48.06 N, 20. 37 E        | ~45-40 | (Adams 2009; Zs Mester 2010; Hauck, Rethemeyer, and Rentzel 2016)         |
| Zlatý Kůň        | Pod_Hradem                     | S                        | Czech Republic        | 49.37 N, 16.72 E         | ~45-40 | (Nejman et al. 2017)                                                      |
| Zlatý Kůň        | Moravský_Krumlov_IV            | S                        | Czech Republic        | 49.05 N, 16.41 E         | ~43-42 | (Nerudová and Neruda 2017)                                                |
| Zlatý Kůň        | Stranska_Skala_III-IIIc        | IUP                      | Czech Republic        | 49.11 N, 16.40           | ~45-40 | (Tostevin 2003)                                                           |

|           |               |     |                |                   |     |                                           |
|-----------|---------------|-----|----------------|-------------------|-----|-------------------------------------------|
| Zlatý Kůň | Brno-Bohunice | IUP | Czech Republic | ~49.12 N, 16.37 E | >45 | (Richter, Tostevin, and Skrdla 2008)      |
| DNASample | BK1653        | UP  | Bulgaria       | 42.95 N, 25.43 E  | ~35 | (Fewlass et al. 2020; Hublin et al. 2020) |

## 28 1.1 IUP-UP definition

29 The definition of a techno-complex is based on the association among specific traits  
30 identified and recorded in archaeological assemblages (e.g. typology and technology of  
31 stone tools). Depending on the degree of magnification used to define a lithic assemblage,  
32 each techno-complex could be seen as more/less similar to others. A broad definition of  
33 techno-complexes could be compatible with models of population structure/movement, but  
34 this requires a high degree of simplification and the loss of finer-grained differences across  
35 the examined sites. On the other hand, a strict definition of a techno-complex could focus on  
36 the specificities of each assemblage, hampering the possibility of gaining a more general  
37 perspective. Strict definitions of lithic assemblages are in fact more compatible with  
38 scenarios of independent development (N. Zwyns and Lbova 2019). In order to develop a  
39 model which considers a wide geographical and chronological scale as the one under  
40 consideration in this work, it is crucial to describe the techno-complexes choosing the key  
41 criteria that are both able to: i) maintain site-specificity; and ii) identify the general  
42 tendencies. The question is how the data are collected and compared and what meaning  
43 can be given to them concerning the question of the origin of technical innovations. New  
44 technologies could be related to demic movements, cultural diffusion/exchange without  
45 implying migration, or parallel convergence, i.e. the same response to common adaptive  
46 challenges. Distinguishing homoplasmy from homology requires testing a hypothesis on the  
47 diversity of cultural traits and understanding it through a comprehensive framework of  
48 technological evolution (E. Boëda et al. 2013; Morgan et al. 2014; Peng et al. 2020; Kuhn  
49 2019; Boyd and Richerson 1988).

50 The terms Initial Upper Paleolithic, Early Upper Paleolithic and Upper Paleolithic, are  
51 commonly used in the scientific literature with different meanings. They could have either a  
52 chronological connotation or a technological one, or both of them. This paper refers to the  
53 term Initial Upper Paleolithic (IUP) to indicate specific techno-complexes characterised by  
54 volumetric blade productions and Levallois reduction sequence (Kuhn 2019; Kuhn and  
55 Zwyns 2014) (Table S2). The term Upper Paleolithic (UP) is used to group the lithic  
56 industries characterised by the production of several standardised blades and bladelets  
57 often together with ornaments and bone tools (Table S2). The non-Mousterian and non-IUP  
58 technologies appeared during the Middle to Upper Palaeolithic transition, comprising  
59 Uluzzian (Benazzi et al. 2011; Moroni et al. 2018; Peresani et al. 2019; Collina et al. 2020;  
60 Marciani et al. 2020; Riel-Salvatore 2009), Châtelperronian (Morgan Roussel 2013;  
61 Ruebens, McPherron, and Hublin 2015; M. Roussel, Soressi, and Hublin 2016), Szeletian

62 (Nerudová and Neruda 2017; Zsolt Mester 2018; Neruda and Nerudová 2019) and  
 63 Lincombian-Ranisian-Jermanowician (LRJ) (Flas 2011; Kot et al. 2020; Krajcarz et al. 2018).

64 **Table S2.** Main criteria adopted in this work to characterise Initial Upper Paleolithic (IUP)  
 65 and Upper Paleolithic (UP) sites.

| <b>Definition</b>       | <b>IUP</b><br><b>Initial Upper Paleolithic</b>                                                                                                                                                                                                                                                                                                                                                                                                                                                                                        | <b>UP</b><br><b>Upper Paleolithic</b>                                                                                                                                                                                                                                                                                                                                                                                                                                                                                                                                                                                                |
|-------------------------|---------------------------------------------------------------------------------------------------------------------------------------------------------------------------------------------------------------------------------------------------------------------------------------------------------------------------------------------------------------------------------------------------------------------------------------------------------------------------------------------------------------------------------------|--------------------------------------------------------------------------------------------------------------------------------------------------------------------------------------------------------------------------------------------------------------------------------------------------------------------------------------------------------------------------------------------------------------------------------------------------------------------------------------------------------------------------------------------------------------------------------------------------------------------------------------|
| Lithic technology       | <p>The IUP is a blade-based production.</p> <p>The reduction sequences use direct hard hammer percussion, platform faceting, and mostly flat-faced or semi-tournant cores. The blades and some cores resemble products of Levallois reduction sequence (Kuhn and Zwyns 2014; Kuhn et al. 2009; Kuhn 2019). Sites in Siberia and Mongolia are also characterised by “burin-cores” for producing small blades and the exploitation of the narrow face cores (Slavinsky et al. 2019; N. Zwyns et al. 2012; N. Zwyns and Lbova 2019).</p> | <p>Blade and bladelet based industries usually used in complementary tools.</p> <p>The broad category of UP includes a great diversity of techno-complexes which share the production of standardised bladelets and blades with a wide range of technical options (e.g. unidirectional debitage by prismatic core, carinated core, burin-cores, among others) and percussion techniques (Zilhão et al. 2006; Le Brun-Ricalens, Bordes, and Eizenberg 2009; Teyssandier, Bon, and Bordes 2010a; Moreau 2012a; Kozłowski 2015b; Bataille 2016; Falcucci 2018; Kadowaki, Suga, and Henry 2021b).</p>                                    |
| Included techno-complex | Emiran (Kuhn, Stiner, and Güleç 1999), Bokerian (Leder 2014, 2017), Bohunician (Richter, Tostevin, and Škrdla 2008; Škrdla 2017; Yuri E. Demidenko, Škrdla, and Rychtaříková 2020), Bachokirian (Hublin et al. 2020).                                                                                                                                                                                                                                                                                                                 | Protoaurignacian and Aurignacian (Teyssandier, Bon, and Bordes 2010b; Sítlivy et al. 2012; Bataille 2016; Y. E. Demidenko and Škrdla 2017; Tafelmaier 2017; Falcucci 2018; Riel-Salvatore and Negrino 2018), Spitsynian (Vishnyatsky and Nehoroshev 2004; Usik, Monigal, and Kulakovskaya 2006), Ahmarian (Kadowaki, Omori, and Nishiaki 2015; Barzilai, Hershkovitz, and Marder 2016; Goring-Morris and Belfer-Cohen 2018), Early Upper Paleolithic (Hoffecker 2011; Kadowaki, Suga, and Henry 2021a), Gravettian (Andey A. Sinitsyn 2007; Dobrovolskaya, Richards, and Trinkaus 2012; Moreau 2012b; Kozłowski 2015a; Klaric 2013). |



|                         |                                                                                                                                                                                                                                                                                                                          |                                                                                                                                                                                                                                                                    |
|-------------------------|--------------------------------------------------------------------------------------------------------------------------------------------------------------------------------------------------------------------------------------------------------------------------------------------------------------------------|--------------------------------------------------------------------------------------------------------------------------------------------------------------------------------------------------------------------------------------------------------------------|
| Other material evidence | In some IUP assemblage is documented the use of personal ornament and formal bone tools e.g. in Levant (Kuhn et al. 2009), Bulgaria, Siberia, and Mongolia (Rybin 2014; Kuhn and Zwyns 2014; Kaifu et al. 2014; Derevianko and Rybin 2003).                                                                              | Habitual use (especially in the Gravettian) of portable art, graphic representations, musical instruments, and various bone tools (Zilhão et al. 2006; Conard 2003; Conard, Malina, and Münzel 2009). Impressive burials sites e.g. Sungir (Trinkaus et al. 2014). |
| Chronology              | Chronologically, the IUP is a long phenomenon comprised between approximately 50 kya and 35 kya (calibrated). Its stratigraphic position follows the Middle Paleolithic assemblages and is before UP assemblage (Nerudová and Neruda 2017; Zsolt Mester 2018; Neruda and Nerudová 2019; Kuhn 2019; Kuhn and Zwyns 2014). | The various stages of the UP make their appearances approximately 42 kya. Their stratigraphic position follows the IUP, Uluzzian, Szeletian, Chatelperronian, LRS.                                                                                                 |

66 **Supplementary Section 2: Genetic dataset**

67 **Table S3: Individuals used in qpGraph trees.** A green background indicates samples  
 68 present in the “Allen Ancient DNA Resource” v44.3 database while an orange background  
 69 indicates samples available from ENA.

| Version ID            | Master ID   | Publication            | GroupID                              | PopID in qpGraph | SNPs    |
|-----------------------|-------------|------------------------|--------------------------------------|------------------|---------|
| GoyetQ116-1_published | GoyetQ116-1 | FuNature2016           | Belgium_UP_GoyetQ116_1_published_all | GoyetQ116-1      | 765579  |
| Chimp.REF             | Chimp       | Genome                 | Chimp.REF                            | Chimp            | 1102442 |
| Tianyuan              | Tianyuan    | YangCurrentBiology2017 | China_Tianyuan                       | Tianyuan         | 885079  |
| HGDP00449.SDG         | HGDP00449   | BergstromScience2020   | Mbuti.SDG                            | Mbuti            | 1140413 |
| HGDP00462.SDG         | HGDP00462   | BergstromScience2020   | Mbuti.SDG                            | Mbuti            | 1137821 |
| HGDP00463.SDG         | HGDP00463   | BergstromScience2020   | Mbuti.SDG                            | Mbuti            | 1137064 |
| HGDP00467.SDG         | HGDP00467   | BergstromScience2020   | Mbuti.SDG                            | Mbuti            | 1136730 |
| HGDP00474.SDG         | HGDP00474   | BergstromScience2020   | Mbuti.SDG                            | Mbuti            | 1140529 |
| HGDP00476.SDG         | HGDP00476   | BergstromScience2020   | Mbuti.SDG                            | Mbuti            | 1140439 |
| HGDP00478.SDG         | HGDP00478   | BergstromScience2020   | Mbuti.SDG                            | Mbuti            | 1137743 |
| HGDP00982.SDG         | HGDP00982   | BergstromScience2020   | Mbuti.SDG                            | Mbuti            | 1126932 |
| HGDP00984.SDG         | HGDP00984   | BergstromScience2020   | Mbuti.SDG                            | Mbuti            | 1137625 |
| HGDP01081.SDG         | HGDP01081   | BergstromScience2020   | Mbuti.SDG                            | Mbuti            | 1135761 |
| B_Papuan-15.DG        | HGDP00546   | PrueferNature2013      | Papuan.DG                            | Papuan           | 1117740 |
| S_Papuan-1.DG         | HGDP00550   | SkoglundNature2015     | Papuan.DG                            | Papuan           | 1118074 |
| S_Papuan-10.DG        | HGDP00553   | SkoglundNature2015     | Papuan.DG                            | Papuan           | 1118955 |
| S_Papuan-11.DG        | HGDP00555   | SkoglundNature2015     | Papuan.DG                            | Papuan           | 1118110 |
| S_Papuan-12.DG        | HGDP00556   | SkoglundNature2015     | Papuan.DG                            | Papuan           | 1116429 |
| S_Papuan-13.DG        | HGDP00552   | SkoglundNature2015     | Papuan.DG                            | Papuan           | 1118089 |
| S_Papuan-14.DG        | HGDP00554   | SkoglundNature2015     | Papuan.DG                            | Papuan           | 1118823 |
| S_Papuan-2.DG         | HGDP00540   | SkoglundNature2015     | Papuan.DG                            | Papuan           | 1118158 |
| S_Papuan-3.DG         | HGDP00541   | SkoglundNature2015     | Papuan.DG                            | Papuan           | 1118510 |
| S_Papuan-4.DG         | HGDP00543   | SkoglundNature2015     | Papuan.DG                            | Papuan           | 1118633 |

|                        |                      |                       |                                  |                     |         |
|------------------------|----------------------|-----------------------|----------------------------------|---------------------|---------|
| S_Papuan-5.DG          | HGDP00545            | SkoglundNature2015    | Papuan.DG                        | Papuan              | 1119621 |
| S_Papuan-6.DG          | HGDP00547            | SkoglundNature2015    | Papuan.DG                        | Papuan              | 1118542 |
| S_Papuan-7.DG          | HGDP00548            | SkoglundNature2015    | Papuan.DG                        | Papuan              | 1119624 |
| S_Papuan-8.DG          | HGDP00549            | SkoglundNature2015    | Papuan.DG                        | Papuan              | 1118670 |
| S_Papuan-9.DG          | HGDP00542            | SkoglundNature2015    | Papuan.DG                        | Papuan              | 1118992 |
| Oase1_d                | Oase1                | FuNature2015          | Romania_Oase                     | Oase1               | 195345  |
| Kostenki14             | Kostenki14           | FuNature2016          | Russia_Kostenki14                | Kostenki14          | 1068326 |
| MA1.SG                 | MA1                  | RaghavanNature2013    | Russia_MA1_HG.SG                 | MA1                 | 805960  |
| Sunghir1.SG            | Sunghir1             | SikoraScience2017     | Russia_Sunghir1.SG               | Sunghir             | 795499  |
| Sunghir2.SG            | Sunghir2             | SikoraScience2017     | Russia_Sunghir2.SG               | Sunghir             | 1136035 |
| Sunghir3.SG            | Sunghir3             | SikoraScience2017     | Russia_Sunghir3.SG               | Sunghir             | 1149730 |
| Sunghir4.SG            | Sunghir4             | SikoraScience2017     | Russia_Sunghir4.SG               | Sunghir             | 1133177 |
| Ust_Ishim_published.DG | Ust_Ishim            | FuNature2014          | Russia_Ust_Ishim_HG_published.DG | Ust_Ishim           | 1147829 |
| Yana_old.SG            | Yana1                | SikoraNature2019      | Russia_Yana_UP.SG                | Yana                | 1150093 |
| Yana_old2.SG           | Yana2                | SikoraNature2019      | Russia_Yana_UP.SG                | Yana                | 1147981 |
| baa001.SG              | baa001               | SchlebuschScience2017 | South_Africa_1900BP.SG           | South_Africa_2000BP | 1149601 |
| I9133.SG               | UCT386               | SkoglundCell2017      | South_Africa_1900BP.SG           | South_Africa_2000BP | 1009127 |
| bab001.SG              | bab001               | SchlebuschScience2017 | South_Africa_2000BP.SG           | South_Africa_2000BP | 719140  |
| I9028.SG               | KhoesanLeipzigHunter | SkoglundCell2017      | South_Africa_2200BP.SG           | South_Africa_2000BP | 718296  |
| Vindija_snpAD.DG       | Vindija              | Pruefer2017           | Vindija_Neanderthal.DG           | Vindija Neanderthal | 1061414 |
|                        | ZKU002               | Pruefer2021           |                                  | ZlatyKun            | 653677  |
|                        | BB7-240              | Hajdinjak2021         |                                  | Bacho_Kiro          | 866466  |
|                        | CC7-335              | Hajdinjak2021         |                                  | Bacho_Kiro          | 783301  |
|                        | F6-620               | Hajdinjak2021         |                                  | Bacho_Kiro          | 1068449 |
|                        | BK_1653              | Hajdinjak2021         |                                  | BK_1653             | 1025353 |

## 70 **Supplementary Section 3: qpGraph analyses**

### 71 **3.1 Base graph with Zlatý Kůň and Eurasian trifurcation**

72 The position of Ust'Ishim with respect to Paleolithic Eastern and Western Eurasian is unclear  
73 and described as a near-trifurcation (Yang et al. 2017; Lipson and Reich 2017) with D-  
74 statistics in the form of (Tianyuan, Sunghir, Ust'Ishim, Chimp), (Tianyuan, Ust'Ishim,  
75 Sunghir, Chimp) and (Sunghir, Ust'Ishim, Tianyuan, Chimp) all not significantly different from  
76 zero (Table S4).

77 We started with the simple population tree proposed by Prufer and colleagues (Prufer et al.  
78 2021) (Fig 2c) with Zlatý Kůň as the most basal non African and placed Ust'Ishim either  
79 basal to the split between Western and Eastern Eurasians, as a sister of East Eurasians or  
80 as a sister of West Eurasians and found that all options are supported with no outlier f4s,  
81 being the highest f4  $|Z\text{-score}| < 3$ . We used Tianyuan as representative ancient "East Asian"  
82 and either Sunghir or Kostenki14 as ancient "West Eurasian".

### 83 **3.2 Adding Bacho Kiro**

84 We then tried to add the IUP Bacho Kiro individuals in different positions of these graphs,  
85 downstream of the Zlatý Kůň split. We assumed Zlatý Kůň to be more basal than Bacho Kiro  
86 because of the following reasons:

- 87 • The Bacho Kiro individuals, set aside their higher Neanderthal admixture proportion,  
88 have been shown to share more alleles with East Asians compared to Europeans,  
89 while Zlatý Kůň is basal to the split between the two (Hajdinjak et al. 2021).
- 90 • f4 in the form (X, Zlatý Kůň, Bacho Kiro, Chimp) with X a later Eurasian individual  
91 including Ust'Ishim tend to be positive, even if not always significant (Table S4).

92 As a first attempt we placed Bacho Kiro basal to Ust'Ishim and all other Eurasians except  
93 Zlatý Kůň (Figure S1.A): the resulting graph is rejected since it has several f4 with  $|Z\text{-scores}|$   
94  $> 3$ , highlighting the fact that the genetic distances expected from the tree designed by the  
95 user do not match the ones computed from the real data and hence implying a poor fit to the  
96 data for the examined tree. f2- statistic results, which are indicators of which samples should  
97 be closer in the tree to account for the observed genetic distance, suggest that Bacho Kiro  
98 should be placed closer to Tianyuan (f2 Z-score = -3) and further from Sunghir (f2 Z-score =  
99 2.6). A similar result is obtained when placing Ust'Ishim basal to Bacho Kiro and Bacho Kiro

100 basal to the split between Europeans and East Asians, here represented by Tianyuan and  
 101 Sunghir (Figure S1.B).  
 102 Rather than adding an admixture event from a Bacho Kiro related population to Tianyuan we  
 103 tried to minimize admixture events and instead placed Bacho Kiro as a sister of Tianyuan,  
 104 hence leaving Ust'Ishim basal to the split Europe/East Asia. This returned a graph with the  
 105 worst (i.e. highest in absolute value) Z-score = -2.7 (Figure S1.C), which hence provides a  
 106 satisfactory fit to the data.

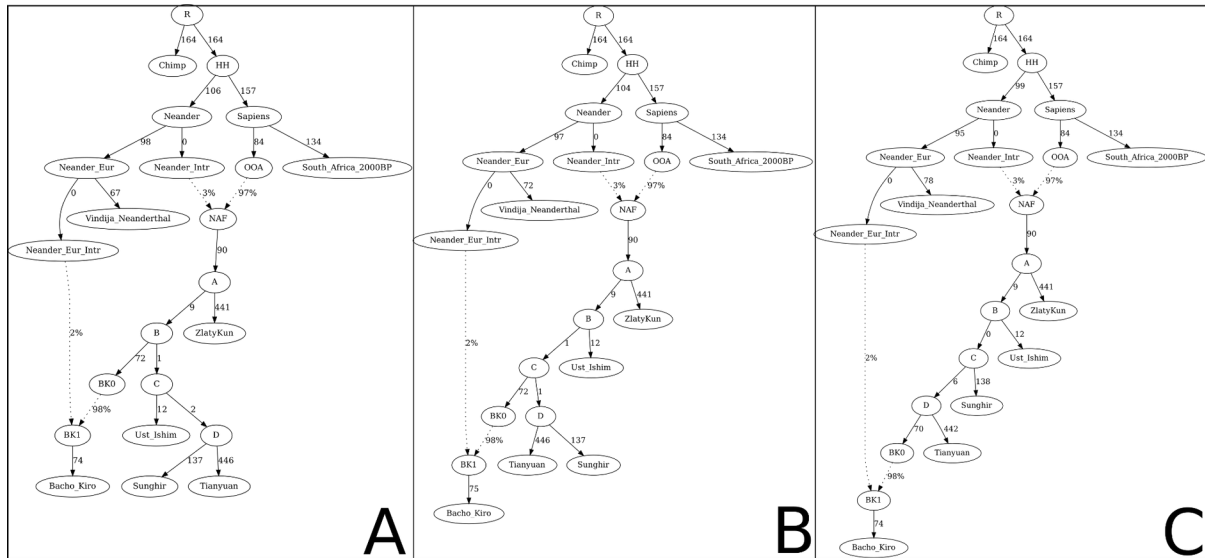

107 **Figure S1 Placement of Bacho Kiro within the tree proposed in Prufer et al. 2021.**  
 108 When taking into account the excess Neanderthal contribution, Bacho Kiro still yields outlier  
 109 f4s when placed soon after the split of Zlatý Kůň (A) or after the separation of Ust'Ishim (B).  
 110 Placing Bacho Kiro as a sister of Tianyuan (C) yields instead no f4 outliers. (Graphs based  
 111 on 423445 SNPs. Highest |Z-score| = 4.3(A, B), 2.7(C))

112 The placement of Bacho Kiro with respect to other Eurasians that we are proposing differs  
 113 from the one proposed by Hajdinjak and colleagues (Hajdinjak et al. 2021) in their Figure  
 114 S6.2. We speculate this may be due to the presence of Zlatý Kůň in our tree who may inform  
 115 the genetic drift that characterizes a basal OoA landscape, or to the availability of  
 116 Neanderthal from the early phases of our qpGraph construction (whose absence, by virtue of  
 117 the additional Neanderthal ancestry compared to other non Africans, can have the effect of  
 118 making Bacho Kiro appear more basal if not immediately accounted for)(Table S4).

119 For the sake of completeness we also tried to position Bacho Kiro as a sister of Sunghir  
 120 (geographically it could make sense). The graph has several f4 |Z-scores| > 3 and is  
 121 therefore rejected.

### 122 3.3 Ust'Ishim as an early leaf of the IUP branch

123 We added Kostenki14, the oldest “genetically European” individual sequenced to date to  
 124 “populate” more the European branch (Figure S2.A – final score 11964). Since we noticed  
 125 that the drift between nodes B and C was 0 and bearing in mind that D-statistics (Table S4)  
 126 and previous graphs supported Sunghir/Tianyuan/Ust'Ishim to be a trifurcation, we tried to  
 127 place Ust'Ishim either as a sister of Tianyuan/Bacho Kiro (Figure S2.B – score 11630) or as  
 128 a sister of Kostenki14/Sunghir (Figure S2.C – score final 11721). All three graphs produce  
 129 no f4 outliers and, when not basal, Ust'Ishim shares only one unit of drift with its sisters  
 130 before branching off (hence showing a near-trifurcation). While all three topologies provide  
 131 no outlier Z scores, the tree where Ust'Ishim is a sister of Tianyuan/Bacho Kiro (Figure  
 132 S2.B), has the lowest final score and so is the most supported.

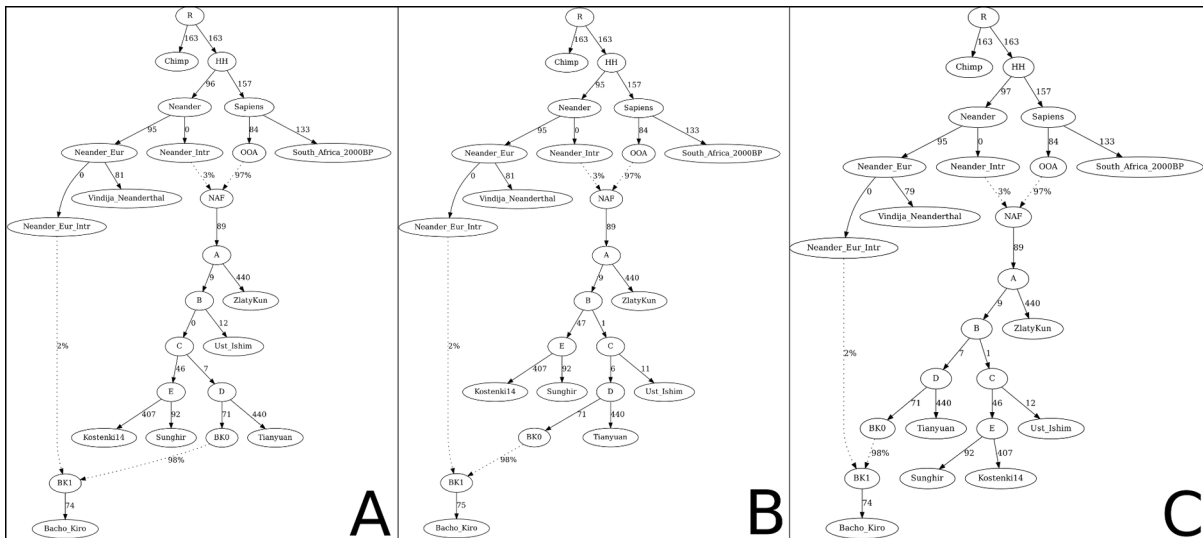

133 **Figure S2 Relationship of Ust'Ishim to other Eurasians.** After adding Kostenki14 as a  
 134 crucial reference sample, we tested all possible positions of Ust'Ishim as either basal to East  
 135 and West Eurasians (A), sister of Bacho Kiro and Tianyuan (B) and sister of Kostenki and  
 136 Sunghir (C). All three graphs produce no f4 outliers and Ust'Ishim shares only one unit of  
 137 drift with its sisters before branching off (hence showing a near-trifurcation). The tree where  
 138 Ust'Ishim is a sister of Tianyuan/Bacho Kiro (Figure S2.B), however, has the lowest final  
 139 score and so is the most supported. (Graphs based on 408905 SNPs. Highest |Z-score| =  
 140 2.7)

### 141 3.4 Oase1 could be simply a descendant of Bacho Kiro, remnant of the IUP movement

142 We then tried to place on the emerging tree of Figure S2.B the ~40 ky old Oase1 individual,  
 143 recovered from a site less than 400 km away from Bacho Kiro cave which, like and more  
 144 than the individuals from Bacho Kiro, has been shown to have a Neanderthal relative in its

145 recent genealogy.

146 Since it has not been possible, based on simple f4s, to determine a higher affinity of Oase1  
147 for either East Asians or Europeans (retrospectively, that might be caused by the  
148 combination of low number of SNPs and high Neanderthal admixture proportion), we started  
149 by making Oase1 a sister of Zlatý Kůň that later admixed with Neanderthals (Figure S3.A).  
150 The resulting graph showed several  $|Z \text{ scores}| > 3$ , an excessive proportion of Neanderthal  
151 in Eurasians and a clear tendency for Oase1 and Bacho Kiro to share more drift ( $f_2$  Z-score  
152 = -6.0), incidentally showing that the quality and quantity of Oase1 genetic information is  
153 nevertheless suitable for a qpGraph analysis. We then placed Oase1 as a sister of Bacho  
154 Kiro with an additional Neanderthal pulse and obtained no outlier f4 and a parsimonious  
155 placement for this elusive sample (Figure S3.B).

156 Our proposed graphs illustrate the claim made by Fu and colleagues (Fu et al. 2015) that  
157 Oase1 experienced an additional pulse of Neanderthal admixture between the one shared  
158 by all non Africans and the one that occurred 4-6 generations before it lived, and identify  
159 said event in the one occurred in the Bacho Kiro population or in a closely related one.

160 A similar graph where the node Oase0 splits from BK0 instead of BK1 (Figure S3.C) is also  
161 not rejected but does not explain this additional event of Neanderthal admixture.

162 To further support the placement of Oase1 and rule out the possibility that its attraction to  
163 Bacho Kiro is driven by the excess of Neanderthal ancestry they share, we proceeded to  
164 mask out the most recent Neanderthal introgressed segments of Oase1 (we used the  
165 genomic coordinates reported in Table S5.1 of Fu et al 2015 (Fu et al. 2015)) and re-run the  
166 analysis: Oase1 holds its position and can be described without the last admixture event with  
167 Neandethal (inferred to be 0) hence confirming its connection with the Bacho Kiro population  
168 or a related one is genuine and not a simple attraction introduced by their shared excess  
169 Neanderthal fraction (Figure S3.D).

170 Finally, it is worth mentioning that while the low coverage, high contamination and high  
171 Neanderthal ancestry of Oase1 prevented the direct assessment of its closer relationship to  
172 either Western or Eastern Eurasians, an individual from the same site and with similar age  
173 (Oase2) showed a clearly higher affinity for East Asian and Native American populations  
174 than with Western Eurasians. The closest sample to Oase2 in outgroup f3 analyses, after  
175 Oase1, was reported to be Tianyuan (the individuals from Bacho Kiro cave were not  
176 available at the time of those analyses), supporting our claim of its placement in the  
177 “genetically East Asian” branch (Siska 2019).

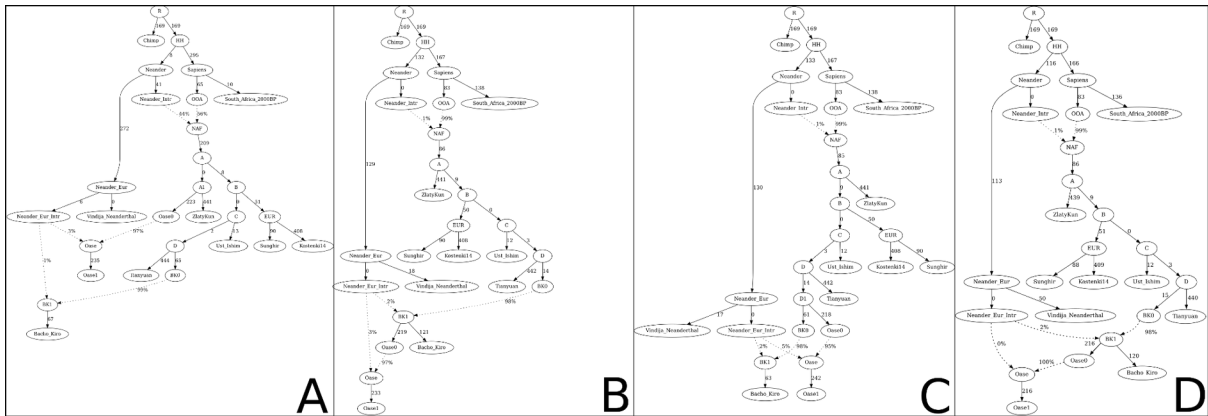

178 **Figure S3 Placement of Oase1 along the IUP tree.** After accounting for the reported recent  
 179 pulse of Neanderthal admixture, Oase1 cannot be described as a simple basal lineage along  
 180 the Eurasian tree (A) and is instead best fit as a descendant of the same population Bacho  
 181 Kiro belonged to (B, C). When masking out the very recent Neanderthal introgressed  
 182 segments present in Oase1, this individual can still be modeled as a sister of Bacho Kiro,  
 183 confirming their attraction is genuine and not mediated by Neanderthal (D). (Graphs A, B, C  
 184 based on 95587 SNPs, graph D based on 88793SNPs. Highest |Z-score| = 7.2(A), 2.6 (B, C,  
 185 D) ).

### 186 3.5 Interaction between Zlatý Kůň and Bacho Kiro

187 Given the geographical proximity of the two sites, we tested whether a contribution to the  
 188 Bacho Kiro individuals by a population related to Zlatý Kůň can be accommodated within our  
 189 so far most supported graph.

190 An admixture event contributing between 2% and 29% from a sister of Zlatý Kůň into the  
 191 ancestors of Bacho Kiro, depending on the position of Ust'Ishim (Figure S4), yields no  
 192 outliers. Although not rejected, these graphs are all less parsimonious than the graph in  
 193 Figure S2.B and might pick up a signal of shared drift between Bacho Kiro and Zlatý Kůň  
 194 that is caused by the reduced time purifying selection had to drive out introgressed  
 195 Neanderthal segments (Zlatý Kůň is the oldest sample and Bacho Kiro has recent  
 196 Neanderthal introgression), rather than a genuine gene flow.



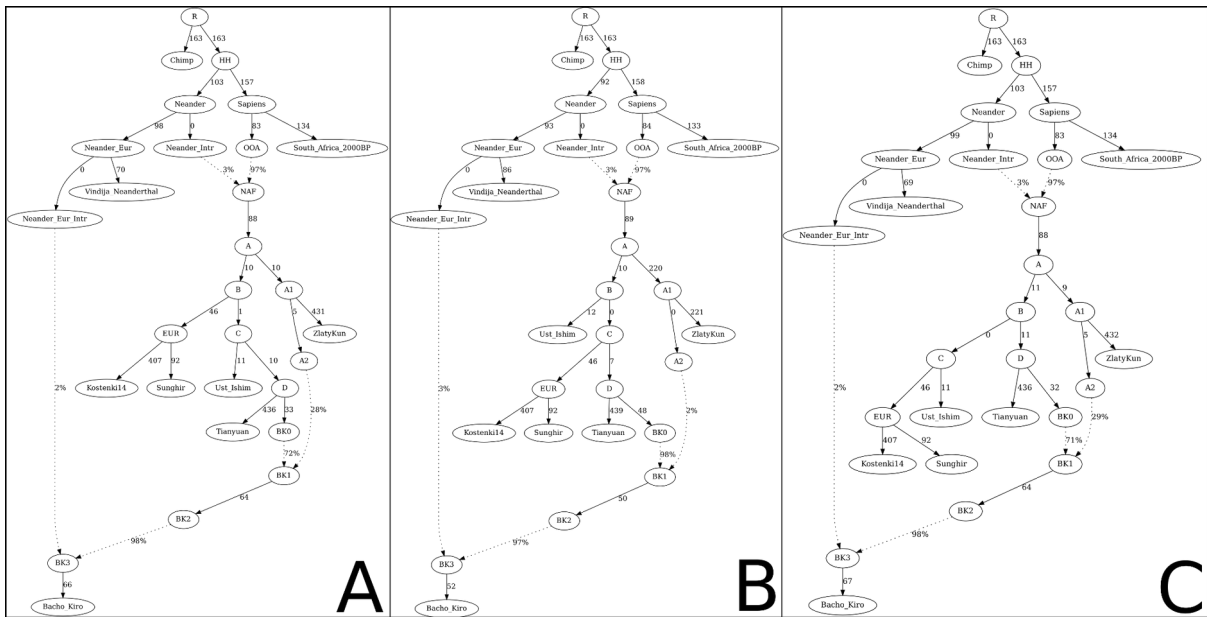

197 **Figure S4 Interaction between Zlatý Kůň and Bacho Kiro.** Given the geographic and  
 198 partial chronological overlap of Zlatý Kůň and Bacho Kiro samples we allowed for a  
 199 contribution of the former on the newly arrived IUP population. Such a contribution is  
 200 acceptable, in varying amounts depending on the position of Ust'Ishim within the tree  
 201 (A,B,C) but given the viability of the trees without this event we decided to exclude it from  
 202 further analyses. (Graphs based on 408905 SNPs. Highest |Z-score| = 2.1 (A, C), 2.3 (B) ).

### 203 3.6 Formation of Paleolithic Siberian ancestry profile

204 Paleolithic Siberian populations younger than 40 ky are consistently described as a mix of  
 205 European and East Asian ancestries (Massilani et al. 2020; Sikora et al. 2019; Raghavan et  
 206 al. 2014), although a comprehensive cultural or population dynamics to account for these  
 207 admixture events is still lacking. Building on our dichotomy between Initial Upper Paleolithic  
 208 (IUP) and Upper Paleolithic waves of expansions across Eurasia, we tried to model ancient  
 209 Siberian individuals as a mixture of these waves into our best fitting parsimonious graph  
 210 (Figure S2.B).

211 We started by creating a Siberian population that is ancestral to the ~32 ky old Yana  
 212 individuals (Massilani et al. 2020; Sikora et al. 2019; Raghavan et al. 2014) as a mixture of  
 213 the E and C nodes in the graph of Figure S2.B. The resulting graph has several f4 outliers  
 214 and indicates that Yana may fit better as more closely related to Tianyuan (f2 Z-score = -6.1)  
 215 and, to a lesser extent, Bacho Kiro (f2 Z-score = -2.1), suggesting that the node of origin of  
 216 the East Asian component in Siberians needs to be moved further down along that branch.  
 217 With the East Asian component of Siberians originating from node D the graph still has



244 sister leaf (**B**). When we relax the model to allow the two Siberian samples to derive  
245 independent fractions of each ancestry we obtain (**C**). The core structure (Siberians as a  
246 mixture of UP and IUP waves) holds even when only transversions are considered but the  
247 reduced number of SNPs makes it difficult to pinpoint the position of the source(**D**). (Graph A  
248 based on 414472 SNPs, graphs B and C based on 303651 SNPs, graph D based on 55427  
249 SNPs . Highest |Z-score| = 2.8 (A), 3.1 (B, C), 2.9 (D)).

### 250 **3.7 Adding GoyetQ116-1 and BK-1653 to the emerging picture of IUP and UP** 251 **interaction in Western Eurasia**

252 The ~35000 years old GoyetQ116-1 individual from Belgium, although closer to Europeans  
253 than to East Asians, shares more alleles with the latter compared to other contemporary  
254 Europeans (Fu et al. 2016) and it has recently been described as a recipient of gene flow  
255 from a population related to Bacho Kiro (Hajdinjak et al. 2021).

256 We started from Figure S5.C and tried to describe Goyet as mixture between the  
257 Kostenki14/Sunghir branch and the Bacho Kiro branch (Figure S6.A); however doing so  
258 shows that Goyet needs to share more drift with Tianyuan (f2 Z-score = -2.5, plus several f4  
259 outliers). On the other hand, sourcing the East Asian genetic component from the node  
260 upstream of Bacho Kiro and Tianyuan (node D) results in the Z scores of f2 with both  
261 Tianyuan and Bacho Kiro to be too low (-2.4 and -2.2 respectively), highlighting how its East  
262 Asian genetic component is more variegated than the one found in Bacho Kiro or Tianyuan  
263 alone (Figure S6.B).

264 When adding to Goyet a contribution from both the Bacho Kiro and Tianyuan branches  
265 (Figure S6.C) we obtained only two minor outliers (Chimp, South\_Africa\_2000BP, ZlatyKun,  
266 Yana = 3.4 and South\_Africa\_2000BP, ZlatyKun, ZlatyKun, Sunghir = -3.3), the first of which  
267 results not significant when computed using all SNPs (Table S4). Notably, the ~35 ky old  
268 Bacho Kiro individual: BK1653 (Hajdinjak et al. 2021), that is associated with Upper  
269 Paleolithic assemblages ([Fewlass et al. 2020](#); [Hublin et al. 2020](#)) can instead be described  
270 more simply as a member of the UP genetic branch that received ~33% contribution from a  
271 population related to the older IUP Bacho Kiro individuals recovered from the same site with  
272 only a minor outlier (ZlatyKun, Tianyuan, Sunghir, MA1 with Z-score -3.3) which results as  
273 non significant when all SNPs are taken into account (Figure S6.D). In the modeling of Goyet  
274 we fixed the proportion of Neanderthal admixture in non Africans using the lock V option of  
275 qpGraph.

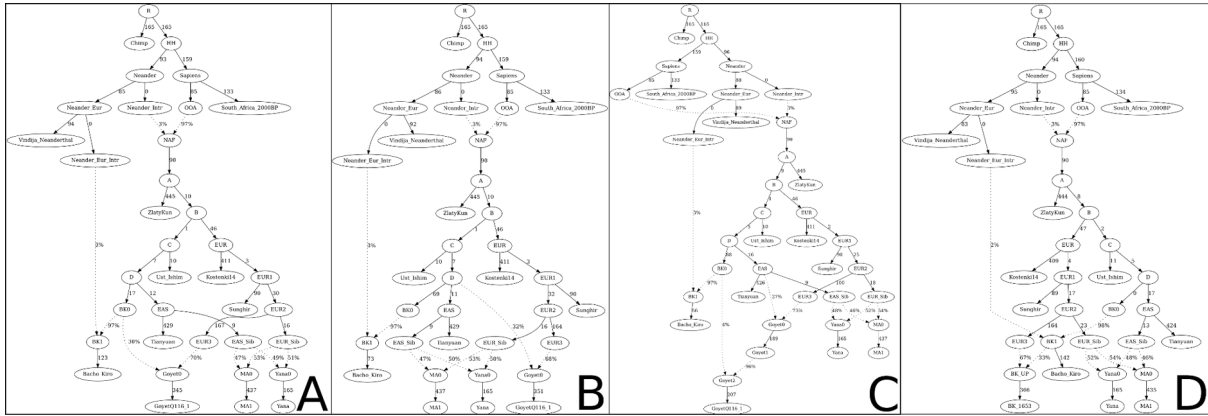

276 **Figure S6 Goyet Q116-1 and BK1653 as a mixture of UP and IUP lineages.** Modelling  
 277 the East Asian component found in Goyet Q116-1 as a simple interaction between UP and  
 278 the Bacho Kiro branch (A) or a node upstream of the Tianyuan-bacho Kiro split (B) yields an  
 279 unexplained attraction between Goyet Q116-1 and Tianyuan. Modelling the IUP component  
 280 as a mixture of Bacho Kiro- and Tianiyuan-related lineages (C) lineages provides a better fit  
 281 to the data. A simple interaction between Bacho Kiro and the UP branch can instead explain  
 282 the ancestry of BK1653(D). (Graphs A, B and C are based on 257802 SNPs, graph D is  
 283 based on 300021 SNPs. Highest |Z-score| = 3.9 (A, B), 3.4 (C), -3.3 (D) ).

### 284 3.8 Peopling of Oceania

285 The position of Oceanian populations with respect to the East and West Eurasian is still  
 286 unclear, with Oceanians often seen as either an earlier split (Malaspinas et al. 2016; Choin  
 287 et al. 2021) or a sister population to East Asians (Wall 2017; Mallick et al. 2016). We  
 288 included Papuans in our model in order to address this.

289 We started from Graph S2.B and tried to have Papuans split from other Eurasians before,  
 290 together or after the split of the Zlatý Kůň lineage; in all cases the graph was rejected as  
 291 papuans needed to share more drift with Tianyuan ( $f_2$  Z-score: -11, -11 and -8). For this  
 292 reason we then modeled them as a sister group of Tianyuan and obtained a graph whose  
 293 only outlier (South\_Africa\_2000BP, Bacho Kiro, Zlatý Kůň, Papuan Z-score = -3.1) resulted  
 294 non significant when taking all SNPs into account (Figure 1.B, Figure S7.A).

295 Subsequently we tried to model Papuans as a mixture of a Tianyuan sister population and a  
 296 more basal lineage; the contribution from said lineage decreases the more that split is  
 297 moved backward: it is 96% when splitting just before the split Tianyuan/Bacho Kiro (Figure  
 298 S7.B), 42% when splitting before Ust'Ishim (Figure S7.C), 26% when splitting after Zlatý Kůň  
 299 but before any other Eurasian branching (Figure S7.D) and only 2% when splitting before  
 300 Zlatý Kůň (Figure S7.E). Finally, we decided to test whether a small contribution to Papuans  
 301 from a population of Anatomically Modern Humans (AMH) that left Africa before the main

302 Out of Africa 70-60 thousands of years ago (kya) and otherwise extinct (xOoA) (Pagani et al.  
303 2016) is rejected by the model (Figure S7.F). A 1% contribution from said population to  
304 modern papuans is not rejected.  
305 All the acceptable solutions for the placement of Papuans within the broader OoA tree  
306 confirm Zlatý Kůň as the most basal human genome among the ones ever found Out of  
307 Africa. In conclusion, Papuans can be described either as an almost even mixture (occurred  
308 sometimes between 45 and 38 kya) between East Asians and a population splitting from  
309 other Eurasians before the IUP expansion, or as a sister lineage of East Asians with or  
310 without a minor basal OoA or xOoA contribution.

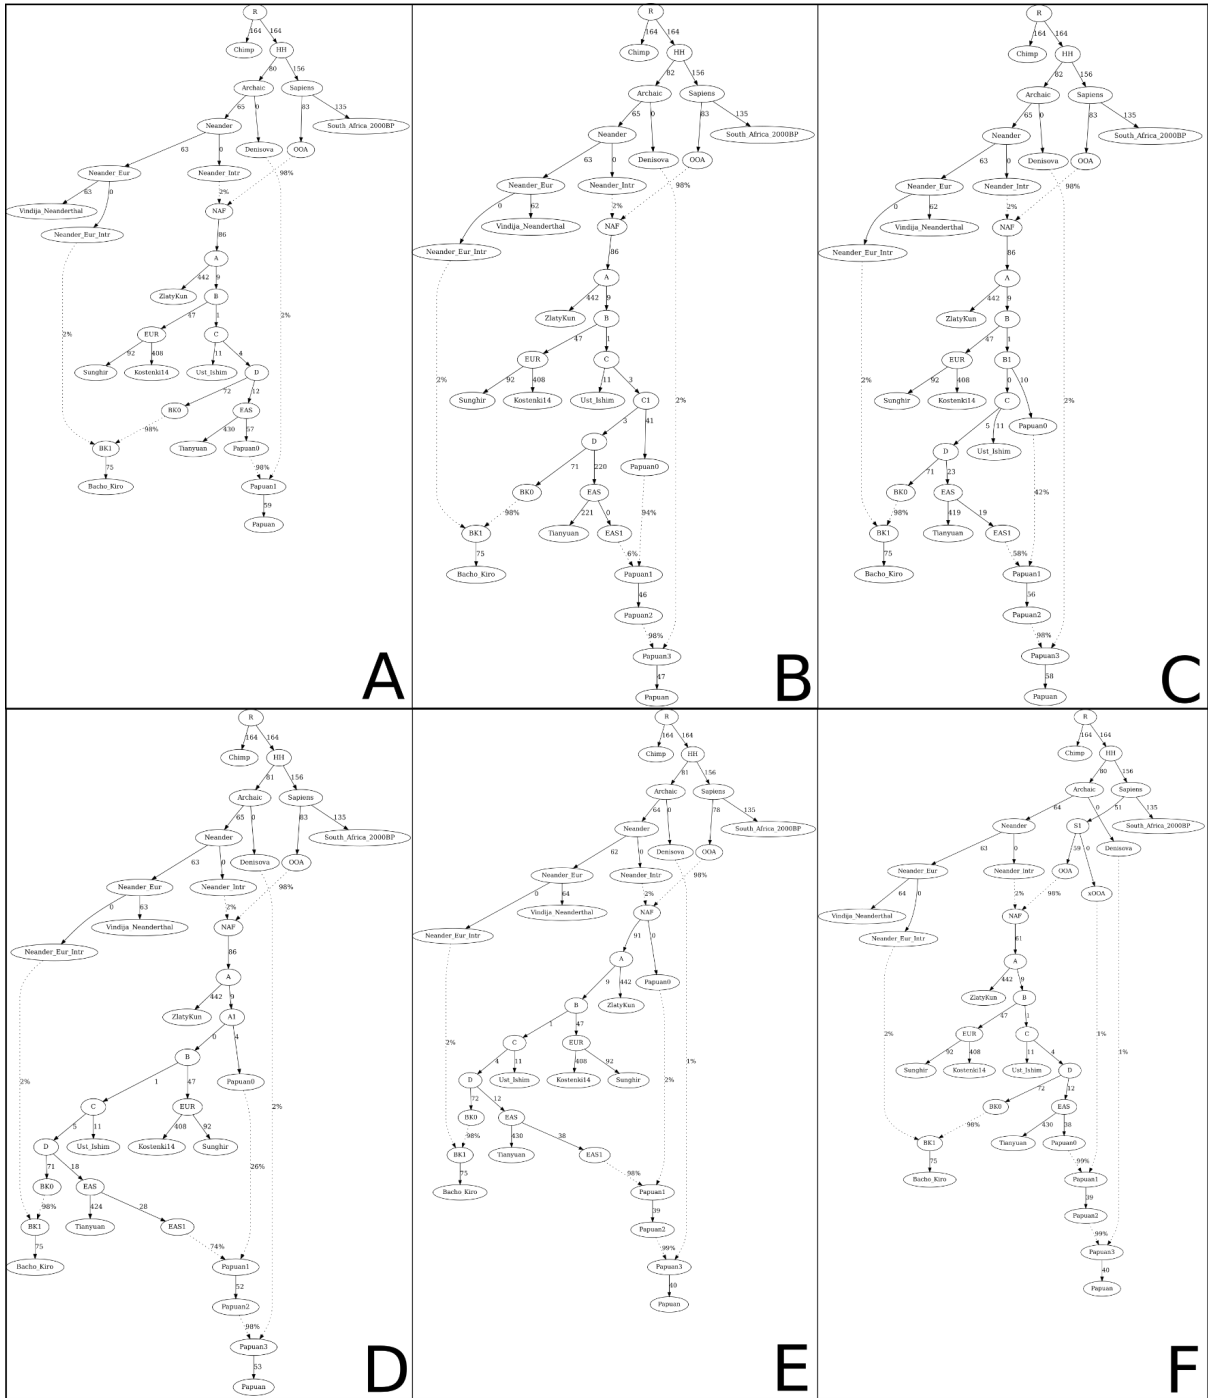

311 **Figure S7** The place of Papuans within the out of Africa graph. Modern Papuans can be  
 312 invariably described as a sister population of Tianyuan (A) with or without the addition of a  
 313 more basal, *H. sapiens* lineage. The position of this deeper lineage along the population  
 314 model influences the genetic contribution it gives to Papuans: 94% if placed within the IUP  
 315 branch after Ust'ishim (B), 42% before Ust'ishim (C), 26% before the separation of IUP and  
 316 UP branches (D), 2% as the most basal OoA branch (E) or even 1% as an extinct, extra  
 317 OoA (xOoA) (F). (Graphs based on 418884 SNPs. Highest |Z-score| = 3.1 (A), 2.8(B, C, D,  
 318 E, F)).

319 **Table S4: Relevant f4 tests.** The first seven columns report population and values as  
320 outputted by Admixtools. The eight column reports the Supplementary Section where a  
321 given f4 is mentioned.

| Pop1                | Pop2                | Pop3       | Pop4   | D       | Z             | BABA  | ABBA  | SNPs    | Section  |
|---------------------|---------------------|------------|--------|---------|---------------|-------|-------|---------|----------|
| Ust_Ishim           | Kostenki14          | Tianyuan   | Chimp  | 0.0006  | 0.087         | 45718 | 45659 | 817238  | 3.1      |
| Ust_Ishim           | Sunghir             | Tianyuan   | Chimp  | -0.0023 | -0.34         | 47517 | 47732 | 847217  | 3.1      |
| Tianyuan            | Kostenki14          | Ust_Ishim  | Chimp  | -0.0037 | -0.523        | 45718 | 46054 | 817238  | 3.1      |
| Tianyuan            | Sunghir             | Ust_Ishim  | Chimp  | 0.0024  | 0.386         | 47517 | 47289 | 847217  | 3.1      |
| Ust_Ishim           | Tianyuan            | Kostenki14 | Chimp  | 0.0043  | 0.588         | 46054 | 45659 | 817238  | 3.1      |
| Ust_Ishim           | Tianyuan            | Sunghir    | Chimp  | -0.0047 | -0.758        | 47289 | 47732 | 847217  | 3.1      |
| Bacho_Kiro          | Kostenki14          | Ust_Ishim  | Chimp  | -0.0276 | <b>-4.337</b> | 56016 | 59200 | 997593  | 3.2      |
| Bacho_Kiro          | Sunghir             | Ust_Ishim  | Chimp  | -0.0194 | <b>-3.581</b> | 59440 | 61792 | 1052955 | 3.2      |
| Bacho_Kiro          | Tianyuan            | Ust_Ishim  | Chimp  | -0.0228 | <b>-3.628</b> | 45780 | 47915 | 841030  | 3.2      |
| Tianyuan            | ZlatyKun            | Bacho_Kiro | Chimp  | 0.0349  | <b>5.005</b>  | 32014 | 29852 | 554809  | 3.2      |
| Kostenki14          | ZlatyKun            | Bacho_Kiro | Chimp  | 0.0124  | 1.821         | 33982 | 33147 | 594315  | 3.2      |
| Sunghir             | ZlatyKun            | Bacho_Kiro | Chimp  | 0.0144  | 2.352         | 35625 | 34612 | 620949  | 3.2      |
| Ust_Ishim           | ZlatyKun            | Bacho_Kiro | Chimp  | 0.0194  | 2.856         | 35526 | 34172 | 619549  | 3.2      |
| ZlatyKun            | Tianyuan            | Sunghir    | MA1    | 0.0085  | 1.112         | 21533 | 21171 | 422908  | 2.6, 2.8 |
| Chimp               | South_Africa_2000BP | ZlatyKun   | Yana   | 0.0122  | 2.864         | 25885 | 25262 | 625628  | 2.6, 2.8 |
| South_Africa_2000BP | Bacho_Kiro          | ZlatyKun   | Papuan | 0.0122  | 2.136         | 36159 | 35288 | 636119  | 3.8      |
| Kostenki14          | ZlatyKun            | Papuan     | Chimp  | 0.029   | <b>4.028</b>  | 34260 | 32330 | 587236  | 3.8      |
| Sunghir             | ZlatyKun            | Papuan     | Chimp  | 0.027   | <b>4.452</b>  | 35811 | 33929 | 614406  | 3.8      |
| Ust_Ishim           | ZlatyKun            | Papuan     | Chimp  | 0.0363  | <b>5.213</b>  | 35842 | 33334 | 613032  | 3.8      |
| Tianyuan            | ZlatyKun            | Papuan     | Chimp  | 0.0736  | <b>10.746</b> | 33107 | 28566 | 547447  | 3.8      |

### 322 **Supplementary Section 4: Unsupervised analysis with OrientAGraph/Treemix**

323 Since qpGraph is a supervised method that relies on a topology provided by the user, we  
324 decided to test the robustness of our base model using an unsupervised method such as  
325 Treemix (Pickrell and Pritchard 2012), taking advantage of the Maximum Likelihood Network  
326 Orientation algorithm recently implemented in OrientAGraph (Molloy et al. 2021).

327 We selected the same set of samples used in supplementary section 3.3 and ran  
 328 OrientAGraph to heuristically identify the best fitting graph; our only input was specifying  
 329 Chimp as root and the gene flow from Neanderthal to Bacho Kiro. The Graph we obtained  
 330 (Figure S8) has the same topology of graph S2.B, with Bacho Kiro sister of Tianyuan and  
 331 Ust'Ishim splitting early from the IUP branch, although qpGraph appears to be a more  
 332 flexible option when multiple admixture events are required to properly explain the data.

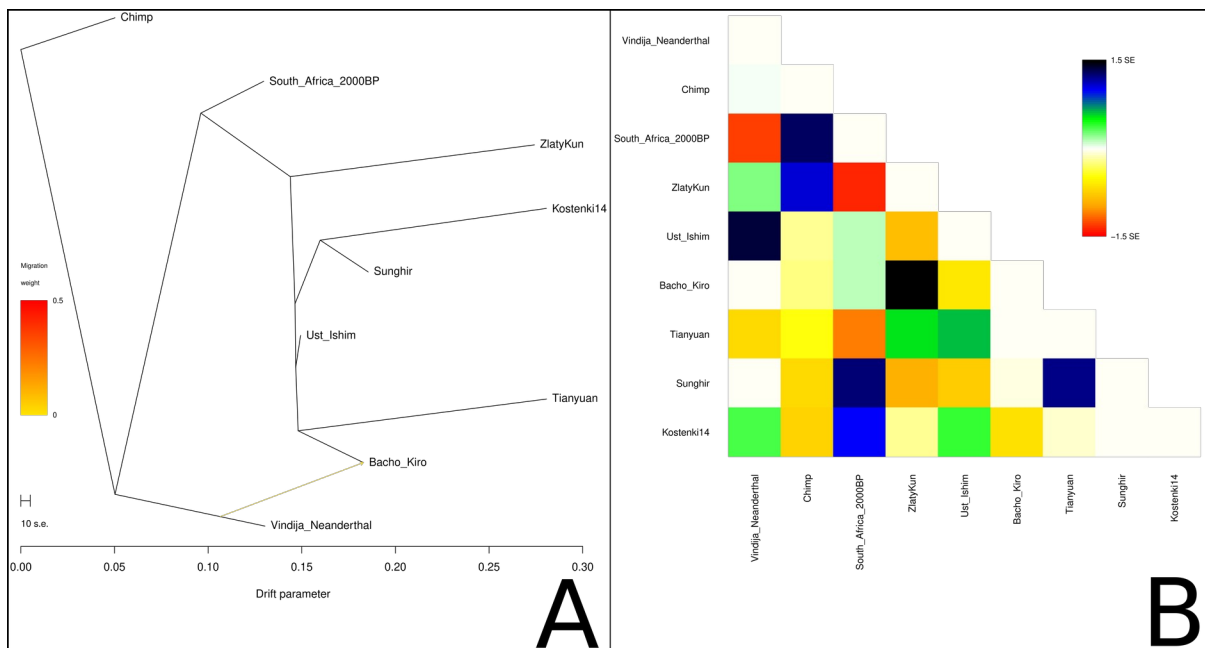

333 **Figure S8 Best fitting admixture graph with OrientAGraph/Treemix** Best fitting tree (A)  
 334 and associated residuals(B) obtained running OrientAGraph/Treemix while specifying only  
 335 chimp as root and the additional gene flow from Neanderthal to Bacho Kiro.

### 336 **Supplementary Section 5: Paleomaps plotting**

337 To plot the paleomaps, we used R (version 4.0.5 - "Shake and Throw"), the GUI RStudio  
 338 (version 1.4.1103 - "Wax Begonia") and the package "oce" (<https://dankelley.github.io/oce/>).  
 339 We downloaded the alti-bathymetric maps from the ETOPO1 dataset (Amante and Eakins  
 340 2009) and used the inferred sea level values at given times in the past from the "Global 1Ma  
 341 Temperature, Sea Level, and Ice Volume Reconstructions" dataset (Bintanja, van de Wal,  
 342 and Oerlemans 2005) available from the NOAA Paleoclimatology Program.  
 343 We plotted the maps applying Lambert conformal conic projections ("+proj=lcc +lat\_1=25  
 344 +lat\_2=50 +lon\_0=97" in PROJ.4 format).



345 **Supplementary References**

- 346 Adams, Brian. 2009. "The Bükk Mountain Szeletian: Old and New Views on 'Transitional'  
 347 Material from the Eponymous Site of the Szeletian." In *Sourcebook of Paleolithic*  
 348 *Transitions: Methods, Theories, and Interpretations*, edited by Marta Camps and Parth  
 349 Chauhan, 427–40. New York, NY: Springer New York.
- 350 Amante, C., and B. W. Eakins. 2009. "ETOPO1 Global Relief Model Converted to PanMap  
 351 Layer Format." PANGAEA. <https://doi.org/10.1594/PANGAEA.769615>.
- 352 Anghelinu, Mircea, and Loredana Niță. 2014. "What's in a Name: The Aurignacian in  
 353 Romania." *Quaternary International: The Journal of the International Union for*  
 354 *Quaternary Research* 351 (November): 172–92.
- 355 Barzilai, Omry, I. Hershkovitz, and O. Marder. 2016. "The Early Upper Paleolithic Period at  
 356 Manot Cave, Western Galilee, Israel." *Human Evolution* 31 (1-2): 85–10.
- 357 Bataille, Guido. 2016. "Extracting the 'Proto' from the Aurignacian. Distinct Production  
 358 Sequences of Blades and Bladelets in the Lower Aurignacian Phase of Siuren I, Units H  
 359 and G (Crimea)." *Mitteilungen Der Gesellschaft Für Urgeschichte* 25 (49): e85.
- 360 Benazzi, Stefano, Katerina Douka, Cinzia Fornai, Catherine C. Bauer, Ottmar Kullmer, Jiří  
 361 Svoboda, Ildikó Pap, et al. 2011. "Early Dispersal of Modern Humans in Europe and  
 362 Implications for Neanderthal Behaviour." *Nature* 479 (7374): 525–28.
- 363 Bergström, Anders, Shane A. McCarthy, Ruoyun Hui, Mohamed A. Almarri, Qasim Ayub,  
 364 Petr Danecek, Yuan Chen, et al. 2020. "Insights into Human Genetic Variation and  
 365 Population History from 929 Diverse Genomes." *Science* 367 (6484).  
 366 <https://doi.org/10.1126/science.aay5012>.
- 367 Bintanja, Richard, Roderik S. W. van de Wal, and Johannes Oerlemans. 2005. "Modelled  
 368 Atmospheric Temperatures and Global Sea Levels over the Past Million Years." *Nature*  
 369 437 (7055): 125–28.
- 370 Boëda, E., Y. M. Hou, H. Forestier, J. Sarel, and H. M. Wang. 2013. "Levallois and Non-  
 371 Levallois Blade Production at Shuidonggou in Ningxia, North China." *Quaternary*  
 372 *International: The Journal of the International Union for Quaternary Research* 295  
 373 (May): 191–203.
- 374 Boëda, Eric, and Stéphanie Bonilauri. 2006. "THE FIRST BLADELET PRODUCTION 40,000  
 375 YEARS AGO." *L'Anthropologie* 44 (1): 75–92.
- 376 Bosch, Marjolein D., Marcello A. Mannino, Amy L. Prendergast, Tamsin C. O'Connell,  
 377 Beatrice Demarchi, Sheila M. Taylor, Laura Niven, Johannes van der Plicht, and Jean-  
 378 Jacques Hublin. 2015. "New Chronology for Ksâr 'Akil (Lebanon) Supports Levantine  
 379 Route of Modern Human Dispersal into Europe." *Proceedings of the National Academy*  
 380 *of Sciences of the United States of America* 112 (25): 7683–88.
- 381 Boyd, Robert, and Peter J. Richerson. 1988. *Culture and the Evolutionary Process*.  
 382 University of Chicago Press.
- 383 Chang, Christopher C., Carson C. Chow, Laurent Cam Tellier, Shashaank Vattikuti, Shaun  
 384 M. Purcell, and James J. Lee. 2015. "Second-Generation PLINK: Rising to the  
 385 Challenge of Larger and Richer Datasets." *GigaScience* 4 (February): 7.
- 386 Chen, Lu, Aaron B. Wolf, Wenqing Fu, Liming Li, and Joshua M. Akey. 2020. "Identifying  
 387 and Interpreting Apparent Neanderthal Ancestry in African Individuals." *Cell* 180 (4):  
 388 677–87.e16.
- 389 Choin, Jeremy, Javier Mendoza-Revilla, Lara R. Arauna, Sebastian Cuadros-Espinoza,  
 390 Olivier Cassar, Maximilian Larena, Albert Min-Shan Ko, et al. 2021. "Genomic Insights  
 391 into Population History and Biological Adaptation in Oceania." *Nature* 592 (7855): 583–  
 392 89.
- 393 Collina, Carmine, Giulia Marciani, Ivan Martini, Carlo Donadio, Leopoldo Repola, Eugenio  
 394 Bortolini, Simona Arrighi, et al. 2020. "Refining the Uluzzian through a New Lithic  
 395 Assemblage from Rocca San Sebastiano (Mondragone, Southern Italy)." *Quaternary*  
 396 *International*. <https://doi.org/10.1016/j.quaint.2020.03.056>.
- 397 Conard, Nicholas J. 2003. "Palaeolithic Ivory Sculptures from Southwestern Germany and

- 398 the Origins of Figurative Art." *Nature* 426 (6968): 830–32.
- 399 Conard, Nicholas J., Maria Malina, and Susanne C. Münzel. 2009. "New Flutes Document  
400 the Earliest Musical Tradition in Southwestern Germany." *Nature* 460 (7256): 737–40.
- 401 Demidenko, Y. E., and P. Škrdla. 2017. "Aurignacian in Moravia New Geochronological,  
402 Lithic and Settlement Data." *Památky Archeologické*.  
403 [http://search.ebscohost.com/login.aspx?  
404 direct=true&profile=ehost&scope=site&authtype=crawler&jrnl=00310506&AN=1361380  
405 07&h=et6blSwXH0wKzdZ%2BYStr1w3WWX1C1u%2B7YNG%2F1bjEJjQsRuL  
406 %2FHCXFatMGly9ew5GfXMK84vFUpUNdc7oDo9%2F2g%3D%3D&crl=c](http://search.ebscohost.com/login.aspx?direct=true&profile=ehost&scope=site&authtype=crawler&jrnl=00310506&AN=136138007&h=et6blSwXH0wKzdZ%2BYStr1w3WWX1C1u%2B7YNG%2F1bjEJjQsRuL%2FHCXFatMGly9ew5GfXMK84vFUpUNdc7oDo9%2F2g%3D%3D&crl=c).
- 407 Demidenko, Yuri E., Petr Škrdla, and Tereza Rychtaříková. 2020. "Initial Upper Paleolithic  
408 Bladelet Production: Bladelets in Moravian Bohunician." *Přehled Výzkumů*.  
409 <https://doi.org/10.47382/pv0611-02>.
- 410 Derevianko, A. P., and E. P. Rybin. 2003. "The Earliest Representations of Symbolic  
411 Behavior by Paleolithic Humans in the Altai Mountains." *Archaeology, Ethnology and  
412 Anthropology of Eurasia*, no. 3: 27–50.
- 413 Derevianko, A. P., E. P. Rybin, S. A. Gladyshev, B. Gunchinsuren, A. A. Tsybankov, and J.  
414 W. Olsen. 2013. "Early Upper Paleolithic Stone Tool Technologies of Northern  
415 Mongolia: The Case of Tolbor-4 and Tolbor-15\*." *Archaeology, Ethnology and  
416 Anthropology of Eurasia* 41 (4): 21–37.
- 417 Dobrovolskaya, M., M-P Richards, and E. Trinkaus. 2012. "Direct Radiocarbon Dates for the  
418 Mid Upper Paleolithic (eastern Gravettian) Burials from Sunghir, Russia." *Bulletins et  
419 Memoires de La Societe D'anthropologie de Paris* 24 (1-2): 96–102.
- 420 Falcucci, Armando. 2018. "Towards a Renewed Definition of the Protoaurignacian."  
421 *Mitteilungen Der Gesellschaft Für Urgeschichte* 27: 87–130.
- 422 Fewlass, Helen, Sahra Talamo, Lukas Wacker, Bernd Kromer, Thibaut Tuna, Yoann  
423 Fagault, Edouard Bard, et al. 2020. "A C Chronology for the Middle to Upper  
424 Palaeolithic Transition at Bacho Kiro Cave, Bulgaria." *Nature Ecology & Evolution* 4 (6):  
425 794–801.
- 426 Flas, Damien. 2011. "The Middle to Upper Paleolithic Transition in Northern Europe: The  
427 Lincombian-Ranisian-Jerzmanowician and the Issue of Acculturation of the Last  
428 Neanderthals." *World Archaeology*. <https://doi.org/10.1080/00438243.2011.624725>.
- 429 Fu, Qiaomei, Mateja Hajdinjak, Oana Teodora Moldovan, Silviu Constantin, Swapan Mallick,  
430 Pontus Skoglund, Nick Patterson, et al. 2015. "An Early Modern Human from Romania  
431 with a Recent Neanderthal Ancestor." *Nature* 524 (7564): 216–19.
- 432 Fu, Qiaomei, Cosimo Posth, Mateja Hajdinjak, Martin Petr, Swapan Mallick, Daniel  
433 Fernandes, Anja Furtwängler, et al. 2016. "The Genetic History of Ice Age Europe."  
434 *Nature* 534 (7606): 200–205.
- 435 Goring-Morris, Nigel, and Anna Belfer-Cohen. 2018. "The Ahmarian in the Context of the  
436 Earlier Upper Palaeolithic in the Near East." In *The Middle and Upper Paleolithic  
437 Archeology of the Levant and Beyond*, edited by Yoshihiro Nishiaki and Takeru  
438 Akazawa, 87–104. Singapore: Springer Singapore.
- 439 Hajdinjak, Mateja, Fabrizio Mafessoni, Laurits Skov, Benjamin Vernot, Alexander Hübner,  
440 Qiaomei Fu, Elena Essel, et al. 2021. "Initial Upper Palaeolithic Humans in Europe Had  
441 Recent Neanderthal Ancestry." *Nature* 592 (7853): 253–57.
- 442 Hammer, Michael F., August E. Woerner, Fernando L. Mendez, Joseph C. Watkins, and  
443 Jeffrey D. Wall. 2011. "Genetic Evidence for Archaic Admixture in Africa." *Proceedings  
444 of the National Academy of Sciences of the United States of America* 108 (37): 15123–  
445 28.
- 446 Hauck, T., J. Rethemeyer, and P. Rentzel. 2016. "Neanderthals or Early Modern Humans? A  
447 Revised 14C Chronology and Geoarchaeological Study of the Szeletian Sequence in  
448 Szeleta Cave (Kom. Borsod-Abaúj ...." *Archäologisches*. <https://edoc.unibas.ch/52894/>.
- 449 Hoffecker, John F. 2011. "The Early Upper Paleolithic of Eastern Europe Reconsidered."  
450 *Evolutionary Anthropology* 20 (1): 24–39.
- 451 Hoffecker, John F., Vance T. Holliday, M. V. Anikovich, A. E. Dudin, N. I. Platonova, V. V.  
452 Popov, G. M. Levkovskaya, et al. 2016. "Kostenki 1 and the Early Upper Paleolithic of

453 Eastern Europe." *Journal of Archaeological Science: Reports* 5 (February): 307–26.

454 Hsieh, Pingsun, August E. Woerner, Jeffrey D. Wall, Joseph Lachance, Sarah A. Tishkoff,

455 Ryan N. Gutenkunst, and Michael F. Hammer. 2016. "Model-Based Analyses of Whole-

456 Genome Data Reveal a Complex Evolutionary History Involving Archaic Introgression in

457 Central African Pygmies." *Genome Research* 26 (3): 291–300.

458 Hublin, Jean-Jacques, Nikolay Sirakov, Vera Aldeias, Shara Bailey, Edouard Bard, Vincent

459 Delvigne, Elena Endarova, et al. 2020. "Initial Upper Palaeolithic Homo Sapiens from

460 Bacho Kiro Cave, Bulgaria." *Nature* 581 (7808): 299–302.

461 Kadowaki, Seiji, Takayuki Omori, and Yoshihiro Nishiaki. 2015. "Variability in Early Ahmari-

462 lithic Technology and Its Implications for the Model of a Levantine Origin of the

463 Protoaurignacian." *Journal of Human Evolution* 82 (May): 67–87.

464 Kadowaki, Seiji, Eiki Suga, and Donald O. Henry. 2021a. "Frequency and Production

465 Technology of Bladelets in Late Middle Paleolithic, Initial Upper Paleolithic, and Early

466 Upper Paleolithic (Ahmari) Assemblages in Jebel Qalkha, Southern Jordan." *Quaternary International*. <https://doi.org/10.1016/j.quaint.2021.03.012>.

467 ———. 2021b. "Frequency and Production Technology of Bladelets in Late Middle

468 Paleolithic, Initial Upper Paleolithic, and Early Upper Paleolithic (Ahmari)

469 Assemblages in Jebel Qalkha, Southern Jordan." *Quaternary International: The Journal*

470 *of the International Union for Quaternary Research*, March.

471 <https://doi.org/10.1016/j.quaint.2021.03.012>.

472

473 Kaifu, Yousuke, Masami Izuhō, Ted Goebel, Hiroyuki Sato, and Akira Ono. 2014.

474 *Emergence and Diversity of Modern Human Behavior in Paleolithic Asia*. Texas A&M

475 University Press.

476 Khenzykhenova, Fedora, Ekaterina Lipnina, Guzel Danukalova, Alexander Shchetnikov,

477 Eugenija Osipova, Elena Semenei, Erdem Tumurov, and Dmitry Lokhov. 2019. "The

478 Area Surrounding the World-Famous Geoarchaeological Site Mal'ta (Baikal Siberia):

479 New Data on the Chronology, Archaeology, and Fauna." *Quaternary International: The*

480 *Journal of the International Union for Quaternary Research* 509 (March): 17–29.

481 Klaric, Laurent. 2013. "Faciès Lithiques et Chronologie Du Gravettien Du Sud Du Bassin

482 Parisien et de Sa Marge Sud-Occidentale." *Pierre Bodu, Lucy Chehmana, Laurent*

483 *Klaric, Ludovic Mevel, Sylvain Soriano eds* 56: 61–88.

484 Kot, Małgorzata, Maciej T. Krajcarz, Magdalena Moskal-del Hoyo, Natalia Gryczewska,

485 Michał Wojenka, Katarzyna Pyżewicz, Virginie Sinet-Mathiot, et al. 2020.

486 "Chronostratigraphy of Jerzmanowician. New Data from Koziarnia Cave, Poland."

487 <https://doi.org/10.1101/2020.04.29.067967>.

488 Kozłowski, Janusz K. 2015a. "The Origin of the Gravettian." *Quaternary International: The*

489 *Journal of the International Union for Quaternary Research* 359–360 (March): 3–18.

490 ———. 2015b. "The Origin of the Gravettian." *Quaternary International: The Journal of the*

491 *International Union for Quaternary Research* 359–360 (March): 3–18.

492 Krajcarz, M. T., M. Krajcarz, B. Ginter, T. Goslar, and P. Wojtal. 2018. "Towards a

493 Chronology of the Jerzmanowician—a New Series of Radiocarbon Dates from

494 Nietoperzowa Cave (Poland)." *Archaeometry* 60 (2): 383–401.

495 Kuhn, Steven L. 2004. "Upper Paleolithic Raw Material Economies at Üçağızlı Cave,

496 Turkey." *Journal of Anthropological Archaeology* 23 (4): 431–48.

497 ———. 2019. "Initial Upper Paleolithic: A (near) Global Problem and a Global Opportunity."

498 *Archaeological Research in Asia* 17 (March): 2–8.

499 Kuhn, Steven L., Mary C. Stiner, and Erksin Güleç. 1999. "Initial Upper Palaeolithic in South-

500 Central Turkey and Its Regional Context: A Preliminary Report." *Antiquity* 73 (281):

501 505–17.

502 Kuhn, Steven L., Mary C. Stiner, Erksin Güleç, İsmail Ozer, Hakan Yılmaz, İsmail Baykara,

503 Aysen Açıkkol, et al. 2009. "The Early Upper Paleolithic Occupations at Uçağızlı Cave

504 (Hatay, Turkey)." *Journal of Human Evolution* 56 (2): 87–113.

505 Kuhn, Steven L., and Nicolas Zwyns. 2014. "Rethinking the Initial Upper Paleolithic."

506 *Quaternary International*. <https://doi.org/10.1016/j.quaint.2014.05.040>.

507 Lbova, Liudmila. 2019. "Pigments on Upper Palaeolithic Mobile Art. Spectral Analysis of

508 Figurines from Mal'ta Culture (Siberia)." HUGO OBERMAIER-GESELLSCHAFT für  
509 Erforschung des Eiszeitalters und der Steinzeit e.V. [https://doi.org/10.7485/QU66\\_8](https://doi.org/10.7485/QU66_8).

510 Le Brun-Ricalens, F. L., J-G Bordes, and L. Eizenberg. 2009. "A Crossed-Glance between  
511 Southern European and Middle-Near Eastern Early Upper Palaeolithic Lithic  
512 Technocomplexes. Existing Models, New Perspectives." In *The Mediterranean from  
513 50,000 to 25,000 Bp: Turning Points and New Directions.*, 66:11–33.

514 Leder, D. 2014. *Technological and Typological Change at the Middle to Upper Palaeolithic  
515 Boundary in Lebanon*.

516 ———. 2017. "Core Reduction Strategies at the Initial Upper Palaeolithic Sites of Ksar Akil  
517 and Abou Halka in Lebanon." *Lithics, The Journal of the Lithic Studies Society*.  
518 [https://www.semanticscholar.org/paper/b3ae3d24daa6256817e3f70d774432699d38e22](https://www.semanticscholar.org/paper/b3ae3d24daa6256817e3f70d774432699d38e22b)  
519 b.

520 Li, Feng, Steven L. Kuhn, Ofer Bar-Yosef, Fu-You Chen, Fei Peng, and Xing Gao. 2019.  
521 "History, Chronology and Techno-Typology of the Upper Paleolithic Sequence in the  
522 Shuidonggou Area, Northern China." *Journal of World Prehistory* 32 (2): 111–41.

523 Lipson, Mark, and David Reich. 2017. "A Working Model of the Deep Relationships of  
524 Diverse Modern Human Genetic Lineages Outside of Africa." *Molecular Biology and  
525 Evolution* 34 (4): 889–902.

526 Lipson, Mark, Isabelle Ribot, Swapan Mallick, Nadin Rohland, Iñigo Olalde, Nicole Adamski,  
527 Nasreen Broomandkhoshbacht, et al. 2020. "Ancient West African Foragers in the  
528 Context of African Population History." *Nature* 577 (7792): 665–70.

529 Malaspinas, Anna-Sapfo, Michael C. Westaway, Craig Muller, Vitor C. Sousa, Oscar Lao,  
530 Isabel Alves, Anders Bergström, et al. 2016. "A Genomic History of Aboriginal  
531 Australia." *Nature* 538 (7624): 207–14.

532 Mallick, Swapan, Heng Li, Mark Lipson, Iain Mathieson, Melissa Gymrek, Fernando Racimo,  
533 Mengyao Zhao, et al. 2016. "The Simons Genome Diversity Project: 300 Genomes from  
534 142 Diverse Populations." *Nature* 538 (7624): 201–6.

535 Marciani, Giulia, Annamaria Ronchitelli, Simona Arrighi, Federica Badino, Eugenio Bortolini,  
536 Paolo Boscato, Francesco Boschini, et al. 2020. "Lithic Techno-Complexes in Italy from  
537 50 to 39 Thousand Years BP: An Overview of Lithic Technological Changes across the  
538 Middle-Upper Palaeolithic Boundary." *Quaternary International*.  
539 <https://doi.org/10.1016/j.quaint.2019.11.005>.

540 Marks, Anthony E., and Daniel Kaufman. 1983. "Boker Tachtit: The Artifacts." *Prehistory and  
541 Paleoenvironments in the Central Negev, Israel* 3: 69–126.

542 Massilani, Diyendo, Laurits Skov, Mateja Hajdinjak, Byambaa Gunchinsuren, Damdinsuren  
543 Tseveendorj, Seonbok Yi, Jungeun Lee, et al. 2020. "Denisovan Ancestry and  
544 Population History of Early East Asians." *Science* 370 (6516): 579–83.

545 Mester, Zs. 2010. "Technological Analysis of Szeletian Bifacial Points from Szeleta Cave  
546 (Hungary)." *Human Evolution* 25 (1-2): 107–23.

547 Mester, Zsolt. 2018. "The Problems of the Szeletian as Seen from Hungary." *Recherches  
548 Archéologique Nouvelle Serie*. <https://doi.org/10.33547/rechacrac.ns9.02>.

549 Meyer, Matthias, Martin Kircher, Marie-Theres Gansauge, Heng Li, Fernando Racimo,  
550 Swapan Mallick, Joshua G. Schraiber, et al. 2012a. "A High-Coverage Genome  
551 Sequence from an Archaic Denisovan Individual." *Science* 338 (6104): 222–26.

552 ———. 2012b. "A High-Coverage Genome Sequence from an Archaic Denisovan  
553 Individual." *Science* 338 (6104): 222–26.

554 Moreau, Luc. 2012a. "Le Gravettien Ancien d'Europe Centrale Revisité : Mise Au Point et  
555 Perspectives." *L'Anthropologie*. <https://doi.org/10.1016/j.anthro.2011.10.002>.

556 ———. 2012b. "Le Gravettien ancien d'Europe centrale revisité : mise au point et  
557 perspectives." *L'Anthropologie* 116 (5): 609–38.

558 Morgan, Christopher, Loukas Barton, Mingjie Yi, Robert L. Bettinger, Xing Gao, and Fei  
559 Peng. 2014. "Redating Shuidonggou Locality 1 and Implications for the Initial Upper  
560 Paleolithic in East Asia." *Radiocarbon*. <https://doi.org/10.2458/56.16270>.

561 Moroni, Adriana, Annamaria Ronchitelli, Simona Arrighi, Daniele Aureli, Shara Bailey, Paolo  
562 Boscato, Francesco Boschini, et al. 2018. "Grotta Del Cavallo (Apulia-Southern Italy).

563 The Uluzzian in the Mirror.” *Journal of Anthropological Sciences = Rivista Di*  
564 *Antropologia: JASS / Istituto Italiano Di Antropologia* 96 (December): 125–60.

565 Nejman, L., R. Wood, D. Wright, L. Lisá, Z. Nerudová, P. Neruda, A. Přichystal, and J.  
566 Svoboda. 2017. “Hominid Visitation of the Moravian Karst during the Middle-Upper  
567 Paleolithic Transition: New Results from Pod Hradem Cave (Czech Republic).” *Journal*  
568 *of Human Evolution* 108 (July): 131–46.

569 Neruda, Petr, and Zdeňka Nerudová. 2019. “Technology of Early Szeletian Leaf Point  
570 Shaping: A Refitting Approach.” *Archaeological and Anthropological Sciences*.  
571 <https://doi.org/10.1007/s12520-019-00818-3>.

572 Nerudová, Zdeňka, and Petr Neruda. 2017. “Technology of Moravian Early Szeletian Leaf  
573 Point Shaping: A Case Study of Refittings from Moravský Krumlov IV Open-Air Site  
574 (Czech Republic).” *Quaternary International*.  
575 <https://doi.org/10.1016/j.quaint.2015.09.065>.

576 Pagani, Luca, Daniel John Lawson, Evelyn Jagoda, Alexander Mörseburg, Anders Eriksson,  
577 Mario Mitt, Florian Clemente, et al. 2016. “Genomic Analyses Inform on Migration  
578 Events during the Peopling of Eurasia.” *Nature* 538 (7624): 238–42.

579 Patterson, Nick, Priya Moorjani, Yontao Luo, Swapan Mallick, Nadin Rohland, Yiping Zhan,  
580 Teri Genschoreck, Teresa Webster, and David Reich. 2012. “Ancient Admixture in  
581 Human History.” *Genetics* 192 (3): 1065–93.

582 Peng, Fei, Sam C. Lin, Ilaria Patania, Vladimir Levchenko, Jialong Guo, Huimin Wang, and  
583 Xing Gao. 2020. “A Chronological Model for the Late Paleolithic at Shuidonggou Locality  
584 2, North China.” *PloS One* 15 (5): e0232682.

585 Peresani, Marco, Stefano Bertola, Davide Delpiano, Stefano Benazzi, and Matteo  
586 Romandini. 2019. “The Uluzzian in the North of Italy: Insights around the New Evidence  
587 at Riparo Broion.” *Archaeological and Anthropological Sciences*.  
588 <https://doi.org/10.1007/s12520-018-0770-z>.

589 Pirson, Stéphane, Damien Flas, Grégory Abrams, Dominique Bonjean, Mona Court-Picon,  
590 Kévin Di Modica, Christelle Draily, et al. 2012. “Chronostratigraphic Context of the  
591 Middle to Upper Palaeolithic Transition: Recent Data from Belgium.” *Quaternary*  
592 *International: The Journal of the International Union for Quaternary Research* 259  
593 (May): 78–94.

594 Pitulko, Vladimir, Elena Pavlova, and Pavel Nikolskiy. 2017. “Revising the Archaeological  
595 Record of the Upper Pleistocene Arctic Siberia: Human Dispersal and Adaptations in  
596 MIS 3 and 2.” *Quaternary Science Reviews* 165 (June): 127–48.

597 Prüfer, Kay, Cosimo Posth, He Yu, Alexander Stoessel, Maria A. Spyrou, Thibaut Deviese,  
598 Marco Mattonai, et al. 2021. “A Genome Sequence from a Modern Human Skull over  
599 45,000 Years Old from Zlatý Kůň in Czechia.” *Nature Ecology & Evolution*, April.  
600 <https://doi.org/10.1038/s41559-021-01443-x>.

601 Raghavan, Maanasa, Pontus Skoglund, Kelly E. Graf, Mait Metspalu, Anders Albrechtsen,  
602 Ida Moltke, Simon Rasmussen, et al. 2014. “Upper Palaeolithic Siberian Genome  
603 Reveals Dual Ancestry of Native Americans.” *Nature* 505 (7481): 87–91.

604 Reich, David, Nick Patterson, Martin Kircher, Frederick Delfin, Madhusudan R. Nandineni,  
605 Irina Pugach, Albert Min-Shan Ko, et al. 2011. “Denisova Admixture and the First  
606 Modern Human Dispersals into Southeast Asia and Oceania.” *American Journal of*  
607 *Human Genetics* 89 (4): 516–28.

608 Richter, D., G. Tostevin, and P. Skrdla. 2008. “Bohunician Technology and  
609 Thermoluminescence Dating of the Type Locality of Brno-Bohunice (Czech Republic).”  
610 *Journal of Human Evolution* 55 (5): 871–85.

611 Riel-Salvatore, Julien. 2009. “What Is a ‘Transitional’ Industry? The Uluzzian of Southern  
612 Italy as a Case Study.” *Sourcebook of Paleolithic Transitions*.  
613 [https://doi.org/10.1007/978-0-387-76487-0\\_25](https://doi.org/10.1007/978-0-387-76487-0_25).

614 Riel-Salvatore, Julien, and Fabio Negrino. 2018. “Proto-Aurignacian Lithic Technology,  
615 Mobility, and Human Niche Construction: A Case Study from Riparo Bombrini, Italy.” In  
616 *Studies in Human Ecology and Adaptation*, 163–87. Cham: Springer International  
617 Publishing.

- 618 Roussel, Morgan. 2013. "Méthodes et rythmes du débitage laminaire au Châtelperronien :  
619 comparaison avec le Protoaurignacien." *Comptes rendus. Palevol* 12 (4): 233–41.
- 620 Roussel, M., M. Soressi, and J-J Hublin. 2016. "The Châtelperronian Conundrum: Blade and  
621 Bladelet Lithic Technologies from Quinçay, France." *Journal of Human Evolution* 95  
622 (June): 13–32.
- 623 Ruebens, Karen, Shannon J. P. McPherron, and Jean-Jacques Hublin. 2015. "On the Local  
624 Mousterian Origin of the Châtelperronian: Integrating Typo-Technological,  
625 Chronostratigraphic and Contextual Data." *Journal of Human Evolution* 86 (September):  
626 55–91.
- 627 Rybin, Evgeny P. 2014. "Tools, Beads, and Migrations: Specific Cultural Traits in the Initial  
628 Upper Paleolithic of Southern Siberia and Central Asia." *Quaternary International: The  
629 Journal of the International Union for Quaternary Research* 347 (October): 39–52.
- 630 Sikora, Martin, Vladimir V. Pitulko, Vitor C. Sousa, Morten E. Allentoft, Lasse Vinner, Simon  
631 Rasmussen, Ashot Margaryan, et al. 2019. "The Population History of Northeastern  
632 Siberia since the Pleistocene." *Nature* 570 (7760): 182–88.
- 633 Sinitsyn, A. A., and J. F. Hoffecker. 2006. "Radiocarbon Dating and Chronology of the Early  
634 Upper Paleolithic at Kostenki." *Quaternary International: The Journal of the International  
635 Union for Quaternary Research* 152-153 (August): 164–74.
- 636 Sinitsyn, Andey A. 2007. "Variabilité Du Gravettien de Kostienki (Bassin Moyen Du Don) et  
637 Des Territoires Associés." *Paléo*, no. 19 (December): 181–201.
- 638 Siska, Veronika. 2019. "Human Population History and Its Interplay with Natural Selection."  
639 Apollo - University of Cambridge Repository. <https://doi.org/10.17863/CAM.31536>.
- 640 Sitlivy, Valéry, Victor Chabai, Mircea Anghelinu, Thorsten Uthmeier, Holger Kels, Alexandra  
641 Hilgers, Christoph Schmidt, et al. 2012. "The Earliest Aurignacian in Romania: New  
642 Investigations at the Open Air Site of Românești-Dumbrăvița I (Banat)."  
643 [https://doi.org/10.7485/QU59\\_4](https://doi.org/10.7485/QU59_4).
- 644 Sitlivy, Valéry, Victor Chabai, Mircea Anghelinu, Thorsten Uthmeier, Holger Kels, Loredana  
645 Niță, Ion Bălțean, Andrei Veselsky, and Cristian Țuțu. 2014. "Preliminary Reassessment  
646 of the Aurignacian in Banat (South-Western Romania)." *Quaternary International: The  
647 Journal of the International Union for Quaternary Research* 351 (November): 193–212.
- 648 Skoglund, Pontus, Swapan Mallick, Maria Cátira Bortolini, Niru Chennagiri, Tábita  
649 Hünemeier, Maria Luiza Petzl-Erler, Francisco Mauro Salzano, Nick Patterson, and  
650 David Reich. 2015. "Genetic Evidence for Two Founding Populations of the Americas."  
651 *Nature* 525 (7567): 104–8.
- 652 Škrdla, Petr. 2017. "Middle to Upper Paleolithic Transition in Moravia: New Sites, New  
653 Dates, New Ideas." *Quaternary International*.  
654 <https://doi.org/10.1016/j.quaint.2016.07.029>.
- 655 Slavinsky, Vyacheslav S., Evgeny P. Rybin, Arina M. Khatsenovich, and Natalia E.  
656 Belousova. 2019. "Intentional Fragmentation of Blades in the Initial Upper Paleolithic  
657 Industries of the Kara-Bom Site (Altai, Russia)." *Archaeological Research in Asia*.  
658 <https://doi.org/10.1016/j.ara.2018.05.002>.
- 659 Tafelmaier, Yvonne. 2017. *Technological Variability at the Beginning of the Aurignacian in  
660 Northern Spain: Implications for the Proto- and Early Aurignacian Distinction*.
- 661 Teyssandier, Nicolas, François Bon, and Jean-Guillaume Bordes. 2010a. "WITHIN  
662 PROJECTILE RANGE: Some Thoughts on the Appearance of the Aurignacian in  
663 Europe." *Journal of Anthropological Research*.  
664 <https://doi.org/10.3998/jar.0521004.0066.203>.
- 665 ———. 2010b. "WITHIN PROJECTILE RANGE: Some Thoughts on the Appearance of the  
666 Aurignacian in Europe." *Journal of Anthropological Research*.  
667 <https://doi.org/10.3998/jar.0521004.0066.203>.
- 668 Tostevin, Gilbert B. 2003. "Attribute Analysis of the Lithic Technologies of Stránská Skála I-  
669 III in Their Regional and Inter-Regional Context: Origins of the Upper Paleolithic in the  
670 Brno Basin." In *Stránská Skála: Origins of the Upper Paleolithic in the Brno Basin*, 77–  
671 118. Peabody Museum Press, Harvard University.
- 672 Trinkaus, Erik, and Alexandra P. Buzhilova. 2018. "Diversity and Differential Disposal of the

- 673 Dead at Sunghir." *Antiquity* 92 (361): 7–21.
- 674 Trinkaus, Erik, A. P. Buzhilova, Mariia Borisovna Mednikova, and Mariia Vsevolodovna  
 675 Dobrovol'skaia. 2014. *The People of Sunghir: Burials, Bodies, and Behavior in the*  
 676 *Earlier Upper Paleolithic*. Oxford University Press.
- 677 Tسانova, Tsenka. 2008. "Les Débuts Du Paléolithique Supérieur Dans l'Est Des Balkans:  
 678 Réflexion à Partir de L'étude Taphonomique et Techno-économique Des Ensembles  
 679 Lithiques Des Sites de Bacho Kiro (couche 11), Temnata (couches VI et 4) et Kozarnika  
 680 (niveau VII)." <https://doi.org/10.30861/9781407301914>.
- 681 Usik, Vitale I., Katherine Monigal, and Larissa Kulakovskaya. 2006. *New Perspectives on the*  
 682 *Transcarpathian Middle to Upper Paleolithic Boundary*. na.
- 683 Vishnyatsky, L. B., and P. E. Nehoroshev. 2004. "The Beginning of the Upper Paleolithic on  
 684 the Russian Plain." *The Early Upper Paleolithic Beyond Western Europe*, 80–96.
- 685 Wall, Jeffrey D. 2017. "Inferring Human Demographic Histories of Non-African Populations  
 686 from Patterns of Allele Sharing." *American Journal of Human Genetics* 100 (5): 766–72.
- 687 Yang, Melinda A., Xing Gao, Christoph Theunert, Haowen Tong, Ayinuer Aximu-Petri, Birgit  
 688 Nickel, Montgomery Slatkin, et al. 2017. "40,000-Year-Old Individual from Asia Provides  
 689 Insight into Early Population Structure in Eurasia." *Current Biology: CB* 27 (20): 3202–  
 690 8.e9.
- 691 Zilhão, João, Francesco d'Errico, Jean-Guillaume Bordes, Arnaud Lenoble, Jean-Pierre  
 692 Texier, and Jean-Philippe Rigaud. 2006. "Analysis of Aurignacian Interstratification at  
 693 the Chatelperronian-Type Site and Implications for the Behavioral Modernity of  
 694 Neandertals." *Proceedings of the National Academy of Sciences of the United States of*  
 695 *America* 103 (33): 12643–48.
- 696 Zwyns, Nicolas, Cleantha H. Paine, Bolorbat Tsendendorj, Sahra Talamo, Kathryn E.  
 697 Fitzsimmons, Angaragdulguun Gantumur, Lkhundev Guunii, et al. 2019. "The Northern  
 698 Route for Human Dispersal in Central and Northeast Asia: New Evidence from the Site  
 699 of Tolbor-16, Mongolia." *Scientific Reports* 9 (1): 11759.
- 700 Zwyns, N., and L. V. Lbova. 2019. "The Initial Upper Paleolithic of Kamenka Site, Zabaikal  
 701 Region (Siberia): A Closer Look at the Blade Technology." *Archaeological Research in*  
 702 *Asia* 17 (March): 24–49.
- 703 Zwyns, N., E. P. Rybin, J-J Hublin, and A. P. Derevianko. 2012. "Burin-Core Technology and  
 704 Laminar Reduction Sequences in the Initial Upper Paleolithic from Kara-Bom (Gorny-  
 705 Altai, Siberia)." *Quaternary International*. <https://doi.org/10.1016/j.quaint.2011.03.036>.
